# Supplementary material
Source: Preprints.org preprint supplement (doi:10.20944/preprints202109.0120.v1)
Supplement: Supplementary file 1 [file Supporting tablesS1-S3.xlsx]

## Sheet: Table S1
Summary of amphipod mitogenomes used in this study
Species	Mitochondrial assembly accession:	Location/City	Country	GPS
Dikerogammarus villosus	* providead upon acceptance	Oder in Zdzieszowice	Poland	50.412N, 18.108E
Dikerogammarus villosus	*providead upon acceptance	Oder in Zdzieszowice	Poland	50.412N, 18.108E
Dikerogammarus villosus	*providead upon acceptance	Durusu Liman	Turkey	41.316N, 28.620E
Dikerogammarus haemobaphes	*providead upon acceptance	Starnbergersee	Germany	47.973N, 11.352E
Dikerogammarus haemobaphes	MK644228	N/A	England	N/A
Dikerogammarus bispinosus	*providead upon acceptance	Danube in Budapest	Hungary	47.518N, 19.042E
Pontogammarus robustoides	*providead upon acceptance	Lake Miedwie in Wierzchwaldzie	Poland	53.312N, 14.912E
Echinogamarus berilloni	*BK059223	Saucats	France	44°39′34″N - 0°34′25″W
Echinogammarus marinus	*BK059224	Portsmouth	France	50°47′41″N - 1°01′50″W
Gammarus fossarum	KY197961	N/A	N/A	N/A
Gammarus fossarum A	*BK059225	Fellering	France	47°53′31″N - 6°58′53″E
Gammarus fossarum B	*BK059226	Saint-Maurice-de-Rémens	France	45°57′21″N - 5°15′44″E
Gammarus fossarum C	*BK059227	Saint-Maurice-de-Rémens	France	45°57′21″N - 5°15′44″E
Gammarus pulex	*BK059228	Saint-Maurice-de-Rémens	France	45°57′21″N - 5°15′44″E
Gammarus pulex	*	Saint-Maurice-de-Rémens	France	45°57′21″N - 5°15′44″E
Gammarus wautieri	*BK059229	Le Grand Serre	France	45°16′27″N - 5°07′08″E
Gammarus wautieri	*	Le Grand Serre	France	45°16′27″N - 5°07′08″E
Crypturopus inflatus	*BK059230	Lake Baikal, Olkhon Gate	Russia	52.99 N, 106.899E
Baikalogammarus pullus	*BK059231	Lake Baikal, Bolshie Koty	Russia	51.90 N, 105.06 E
Echiuropus macronychus	*BK059232	Lake Baikal, Olkhon Gate	Russia	52.99 N, 106.90 E
Acanthogammarus victorii (Dybowsky, 1874)	KX341962	Lake Baikal, Listvyanka	Russia	51.858N, 104.844E
Brachyuropus grewingkii	KP161875	Lake Baikal, Estuary of Buguldeyka river	Russia	52.467N, 106.083E
Crypturopus tuberculatus	KX341963	Lake Baikal, Estuary of Anga river	Russia	52.778N, 106.583E
Homoeogammarus veneris	*BK059233	N/A	Italy	N/A
Eulimnogammarus cyaneus	KX341964	Lake Baikal, Sukhoi Ruchey	Russia	51.647N, 103.754E
Eulimnogammarus verrucosus	KF690638	Lake Baikal, Bol’shie Koty	Russia	51.903N, 105.069E
Eulimnogammarus vittatus	KM287572	Lake Baikal, Sukhoi Ruchey	Russia	51.647N, 103.754E
Gammarus chevreuxi	*BK059234	Plym estuary, Plymouth	England	50.65N, 4.15W
Gammarus duebeni	JN704067	Ellidaarvogur, Reykjavik	Iceland	64.12N, 21.83W
Gammarus fossarum	KY197961	Grundbächle stream	Germany	47.83N 7.93E
Gammarus lacustris	MK354235	Lake Baikal, Olkhon Island	Russia	53.07N, 106.93E
Gammarus pulex (fossarum)	*	Liege	Belgium	50°34′60′N, 5°34′60″E /50°36′00″N, 5°37′58″E
Gammarus roeselii	MG779536	Trouhans, Ouche river	France	N/A
Garjajewia cabanisii	KX341965	Lake Baikal, Estuary of Buguldeyka river	Russia	52.467N, 106.083E
Gmelinoides fasciatus	KX341966	Lake Baikal, Sukhoi Ruchey	Russia	51.642N, 103.767E
Gondogeneia antarctica	JN827386	Marian Cove and on Barton Peninsula, King George Island	West Antarctica*	62.23S, 58.78W
Linevichella vortex	KX341967	Lake Baikal, Listvyanka	Russia	51.853N, 104.863E
Pallaseopsis kesslerii	KX341968	Lake Baikal, Estuary of Anga river	Russia	52.778N, 106.583E
Pandorites podoceroides (Obesogammarus creasus)	*BK059235	Caspian Sea,	Russia	N/A
*- reconstucted in this study

## Sheet: Table S2
Dikerogammarus villosus from Turkey (TR41)															Dikerogammarus villosus from England															Dikerogammarus haemobaphes from Germany
Name	Type	Minimum	Maximum	Length	Direction	Amino Acid Change	CDS Position	Change	Codon Change	Coverage	Polymorphism Type	Protein Effect	Variant Frequency	Variant P-Value (approximate)	Name	Type	Minimum	Maximum	Length	Direction	Amino Acid Change	CDS Position	Change	Codon Change	Coverage	Polymorphism Type	Protein Effect	Variant Frequency	Variant P-Value (approximate)	Name	Type	Minimum	Maximum	Length	Direction	Change	Coverage	Polymorphism Type	Variant Frequency	Variant P-Value (approximate)
COX1 CDS	CDS	1	1535	1535	forward										COX1 CDS	CDS	1	1535	1535	forward										cox1	gene	1	1515	1515	forward
C	Polymorphism	66	66	1	none		66	T -> C	ATT -> ATC	85	SNP (transition)	None	1	3.2e-298	C	Polymorphism	837	837	1	none		837	G -> C	GGG -> GGC	54	SNP (transversion)	None	0.352	7.3e-55	G	Polymorphism	294	294	1	none	A -> G	87	SNP (transition)	1	2e-270
A	Polymorphism	1179	1179	1	none	H -> Q	1179	T -> A	CAT -> CAA	73	SNP (transversion)	Substitution	0.986	4.6e-222	T	Polymorphism	1047	1047	1	none		1047	C -> T	GGC -> GGT	48	SNP (transition)	None	0.708	1.9e-111	C	Polymorphism	1411	1411	1	none	A -> C	174	SNP (transversion)	0.983	0
A	Polymorphism	1368	1368	1	none		1368	G -> A	TCG -> TCA	73	SNP (transition)	None	1	6.3e-249	tRNA-Leu	tRNA	1535	1595	61	forward										trnL2(tta)	tRNA	1535	1595	61	forward
tRNA-Leu	tRNA	1535	1595	61	forward										COX2 CDS	CDS	1596	2273	678	forward										cox2	gene	1611	2258	648	forward
COX2 CDS	CDS	1596	2273	678	forward										T	Polymorphism	1901	1901	1	none		306	C -> T	CAC -> CAT	59	SNP (transition)	None	0.797	7e-158	C	Polymorphism	1981	1981	1	none	T -> C	106	SNP (transition)	1	0
T	Polymorphism	1901	1901	1	none		306	C -> T	CAC -> CAT	84	SNP (transition)	None	1	1e-294	tRNA-Lys	tRNA	2276	2339	64	forward										trnK(aaa)	tRNA	2277	2339	63	forward
tRNA-Lys	tRNA	2276	2339	64	forward										tRNA-Asp	tRNA	2340	2401	62	forward										trnD(gac)	tRNA	2340	2401	62	forward
tRNA-Asp	tRNA	2340	2401	62	forward										ATP8 CDS	CDS	2402	2560	159	forward										atp8-0	gene	2402	2557	156	forward
ATP8 CDS	CDS	2402	2560	159	forward										ATP6 CDS	CDS	2554	3225	672	forward										G	Polymorphism	2496	2496	1	none	A -> G	74	SNP (transition)	1	6.3e-245
C	Polymorphism	2521	2521	1	none		120	T -> C	AAT -> AAC	63	SNP (transition)	None	1	1.6e-227	T	Polymorphism	2651	2651	1	none	T -> I	98	C -> T	ACC -> ATC	43	SNP (transition)	Substitution	1	3.2e-151	T	Polymorphism	2503	2503	1	none	C -> T	80	SNP (transition)	1	1e-256
ATP6 CDS	CDS	2554	3225	672	forward										G	Polymorphism	2655	2655	1	none		102	A -> G	ATA -> ATG	43	SNP (transition)	None	0.581	1.9e-76	atp6	gene	2554	3213	660	forward
GT	Polymorphism	2650	2651	2	none	T -> V	97	AC -> GT	ACC -> GTC	37	Substitution	Substitution	1	1.6e-126	COX3 CDS	CDS	3225	4010	786	forward										cox3	gene	3225	4007	783	forward
G	Polymorphism	2655	2655	1	none		102	A -> G	ATA -> ATG	40	SNP (transition)	None	1	1e-132	ND3 CDS	CDS	4017	4370	354	forward										G	Polymorphism	3356	3356	1	none	A -> G	126	SNP (transition)	1	0
COX3 CDS	CDS	3225	4010	786	forward										G	Polymorphism	4181	4181	1	none		165	A -> G	TTA -> TTG	27	SNP (transition)	None	0.407	5.2e-31	T	Polymorphism	3509	3509	1	none	C -> T	85	SNP (transition)	1	3.2e-264
ND3 CDS	CDS	4017	4370	354	forward										tRNA-Ala	tRNA	4369	4433	65	forward										G	Polymorphism	3598	3598	1	none	A -> G	135	SNP (transition)	1	0
A	Polymorphism	4253	4253	1	none		237	G -> A	TTG -> TTA	39	SNP (transition)	None	1	1.6e-125	tRNA-Ser	tRNA	4433	4483	51	forward										nad3	gene	4017	4361	345	forward
tRNA-Ala	tRNA	4369	4433	65	forward										tRNA-Asn	tRNA	4483	4543	61	forward										trnA(gca)	tRNA	4369	4431	63	forward
tRNA-Ser	tRNA	4433	4483	51	forward										tRNA-Arg	tRNA	4548	4602	55	forward										trnS1(aga)	tRNA	4431	4483	53	forward
tRNA-Asn	tRNA	4483	4543	61	forward										tRNA-Glu	tRNA	4606	4667	62	forward										trnN(aac)	tRNA	4482	4542	61	forward
tRNA-Arg	tRNA	4548	4602	55	forward										tRNA-Phe	tRNA	4668	4728	61	reverse										trnR(cga)	tRNA	4547	4598	52	forward
tRNA-Glu	tRNA	4606	4667	62	forward										ND5 CDS	CDS	4729	6424	1696	reverse										trnE(gaa)	tRNA	4603	4664	62	forward
tRNA-Phe	tRNA	4668	4728	61	reverse										G	Polymorphism	5232	5232	1	none	L -> P	1193	A -> G	CTT -> CCT	55	SNP (transition)	Substitution	0.691	1.1e-123	trnF(ttc)	tRNA	4666	4725	60	reverse
ND5 CDS	CDS	4729	6424	1696	reverse										C	Polymorphism	5449	5449	1	none	I -> V	976	T -> C	ATC -> GTC	43	SNP (transition)	Substitution	0.674	3.1e-94	nad5	gene	4736	6394	1659	reverse
A	Polymorphism	5103	5103	1	none	S -> L	1322	G -> A	TCA -> TTA	97	SNP (transition)	Substitution	1	2e-301	G	Polymorphism	5555	5555	1	none		870	A -> G	CAT -> CAC	45	SNP (transition)	None	0.333	3.4e-43	G	Polymorphism	4740	4740	1	none	A -> G	158	SNP (transition)	0.975	0
G	Polymorphism	5216	5216	1	none		1209	A -> G	GGT -> GGC	92	SNP (transition)	None	0.989	4.6e-299	C	Polymorphism	5615	5615	1	none		810	T -> C	AGA -> AGG	51	SNP (transition)	None	0.765	5e-126	T	Polymorphism	5219	5219	1	none	C -> T	135	SNP (transition)	1	0
G	Polymorphism	5232	5232	1	none	L -> P	1193	A -> G	CTT -> CCT	101	SNP (transition)	Substitution	0.99	0	G	Polymorphism	5813	5813	1	none		612	A -> G	ACT -> ACC	30	SNP (transition)	None	0.4	5.4e-36	C	Polymorphism	5248	5248	1	none	T -> C	152	SNP (transition)	1	0
A	Polymorphism	5299	5299	1	none		1126	G -> A	CTA -> TTA	99	SNP (transition)	None	1	1e-297	tRNA-His	tRNA	6473	6533	61	reverse										G	Polymorphism	5276	5276	1	none	A -> G	171	SNP (transition)	0.994	0
G	Polymorphism	6400	6400	1	none		25	A -> G	TTA -> CTA	30	SNP (transition)	None	1	1e-105	ND4 CDS	CDS	6533	7834	1302	reverse										C	Polymorphism	5852	5852	1	none	T -> C	117	SNP (transition)	0.983	0
tRNA-His	tRNA	6473	6533	61	reverse										T	Polymorphism	6839	6839	1	none		996	A -> T	AGT -> AGA	79	SNP (transversion)	None	0.684	2.5e-169	trnH(cac)	tRNA	6469	6529	61	reverse
ND4 CDS	CDS	6533	7834	1302	reverse										G	Polymorphism	7424	7424	1	none		411	A -> G	TAT -> TAC	14	SNP (transition)	None	0.643	8e-30	nad4-0	gene	6553	7794	1242	reverse
T	Polymorphism	6839	6839	1	none		996	A -> T	AGT -> AGA	64	SNP (transversion)	None	1	6.3e-212	A	Polymorphism	7460	7460	1	none		375	G -> A	CCC -> CCT	12	SNP (transition)	None	0.833	6.6e-35	C	Polymorphism	6621	6621	1	none	T -> C	121	SNP (transition)	0.992	0
T	Polymorphism	7064	7064	1	none		771	C -> T	CAG -> CAA	84	SNP (transition)	None	1	6.3e-278	A	Polymorphism	7753	7753	1	none	L -> F	82	G -> A	CTT -> TTT	39	SNP (transition)	Substitution	1	3.2e-137	G	Polymorphism	6745	6745	1	none	T -> G	95	SNP (transversion)	1	3.2e-295
G	Polymorphism	7424	7424	1	none		411	A -> G	TAT -> TAC	83	SNP (transition)	None	1	1.3e-274	ND4L CDS	CDS	7840	8133	294	reverse										G	Polymorphism	6799	6799	1	none	A -> G	94	SNP (transition)	1	2.5E-320
A	Polymorphism	7460	7460	1	none		375	G -> A	CCC -> CCT	57	SNP (transition)	None	0.982	3.6e-178	tRNA-Thr	tRNA	8135	8196	62	forward										C	Polymorphism	6855	6855	1	none	A -> C	103	SNP (transversion)	0.981	3.3E-320
G	Polymorphism	7470	7470	1	none	G -> A	365	C -> G	GGT -> GCT	65	SNP (transversion)	Substitution	0.292	4.3e-07	tRNA-Pro	tRNA	8193	8260	68	reverse										C	Polymorphism	6990	6990	1	none	T -> C	184	SNP (transition)	0.995	0
A	Polymorphism	7753	7753	1	none	L -> F	82	G -> A	CTT -> TTT	42	SNP (transition)	Substitution	1	4e-135	ND6 CDS	CDS	8263	8766	504	forward										A	Polymorphism	7258	7258	1	none	G -> A	86	SNP (transition)	0.953	2.1e-240
ND4L CDS	CDS	7840	8133	294	reverse										CYTB CDS	CDS	8766	9902	1137	forward										C	Polymorphism	7600	7600	1	none	T -> C	70	SNP (transition)	1	1e-224
tRNA-Thr	tRNA	8135	8196	62	forward										A	Polymorphism	8941	8941	1	none	S -> K	176	G -> A	AGA -> AAA	84	SNP (transition)	Substitution	0.512	1e-122	nad4l	gene	7839	8111	273	reverse
tRNA-Pro	tRNA	8193	8260	68	reverse										T	Polymorphism	8963	8963	1	none		198	C -> T	ATC -> ATT	100	SNP (transition)	None	0.47	5.3e-141	G	Polymorphism	8052	8052	1	none	A -> G	58	SNP (transition)	1	6.3e-198
ND6 CDS	CDS	8263	8766	504	forward										tRNA-Ser	tRNA	9901	9960	60	forward										G	Polymorphism	8110	8110	1	none	A -> G	119	SNP (transition)	1	0
C	Polymorphism	8481	8481	1	none		219	T -> C	TCT -> TCC	57	SNP (transition)	None	1	7.9e-189	ND1 CDS	CDS	9963	10895	933	reverse										trnT(aca)	tRNA	8131	8191	61	forward
CYTB CDS	CDS	8766	9902	1137	forward										C	Polymorphism	10644	10644	1	none		252	T -> C	AGA -> AGG	58	SNP (transition)	None	0.759	4e-146	A	Polymorphism	8187	8187	1	none	G -> A	99	SNP (transition)	1	1.6E-317
C	Polymorphism	9504	9504	1	none	Y -> H	739	T -> C	TAC -> CAC	66	SNP (transition)	Substitution	0.985	6.6e-233	G	Polymorphism	10866	10866	1	none		30	A -> G	TAT -> TAC	38	SNP (transition)	None	1	1e-133	trnP(cca)	tRNA	8191	8256	66	reverse
tRNA-Ser	tRNA	9901	9960	60	forward										tRNA-Leu	tRNA	10896	10956	61	reverse										nad6	gene	8266	8754	489	forward
ND1 CDS	CDS	9963	10895	933	reverse										16S rRNA	rRNA	10957	11928	972	reverse										G	Polymorphism	8497	8497	1	none	A -> G	108	SNP (transition)	1	0
G	Polymorphism	10392	10392	1	none		504	A -> G	GGT -> GGC	87	SNP (transition)	None	0.989	8.7e-300	tRNA-Val	tRNA	11929	11984	56	reverse										G	Polymorphism	8666	8666	1	none	A -> G	118	SNP (transition)	0.992	0
G	Polymorphism	10866	10866	1	none		30	A -> G	TAT -> TAC	69	SNP (transition)	None	0.986	1.1e-243	12S rRNA	rRNA	11985	12623	639	reverse										cob	gene	8778	9896	1119	forward
tRNA-Leu	tRNA	10896	10956	61	reverse										T	Polymorphism	13299	13299	1	none			A -> T		13	SNP (transversion)		0.462	4.3e-19	G	Polymorphism	8796	8796	1	none	A -> G	83	SNP (transition)	1	1e-249
16S rRNA	rRNA	10957	11928	972	reverse										C	Polymorphism	13322	13322	1	none			T -> C		13	SNP (transition)		1	1.6e-47	C	Polymorphism	8889	8889	1	none	T -> C	142	SNP (transition)	1	0
C	Polymorphism	11150	11150	1	none			T -> C		52	SNP (transition)		0.962	1.3e-172	tRNA-Tyr	tRNA	13729	13791	63	reverse										G	Polymorphism	8895	8895	1	none	A -> G	108	SNP (transition)	1	0
tRNA-Val	tRNA	11929	11984	56	reverse										tRNA-Gln	tRNA	13788	13847	60	reverse										T	Polymorphism	9412	9412	1	none	C -> T	104	SNP (transition)	0.971	0
C	Polymorphism	11976	11976	1	none			T -> C		36	SNP (transition)		1	6.3e-116	tRNA-Cys	tRNA	13850	13904	55	reverse										A	Polymorphism	9812	9812	1	none	C -> A	118	SNP (transversion)	1	0
12S rRNA	rRNA	11985	12623	639	reverse										tRNA-Ile	tRNA	13942	14005	64	forward										trnS2(tca)	tRNA	9901	9959	59	forward
T	Polymorphism	12185	12184	0	none			(T)5 -> (T)6		44	Insertion (tandem repeat)		1	1.6e-141	tRNA-Met	tRNA	14008	14070	63	forward										nad1	gene	9986	10885	900	reverse
A	Polymorphism	12385	12385	1	none			G -> A		42	SNP (transition)		1	1e-147	ND2 CDS	CDS	14071	15053	983	forward										A	Polymorphism	10333	10333	1	none	C -> A	179	SNP (transversion)	0.978	0
T	Polymorphism	13128	13128	1	none			A -> T		5	SNP (transversion)		0.6	2.5e-09	tRNA-Trp	tRNA	15054	15115	62	forward										trnL1(cta)	tRNA	10895	10955	61	reverse
G	Polymorphism	13140	13140	1	none			T -> G		6	SNP (transversion)		0.333	6e-07	tRNA-Gly	tRNA	15114	15175	62	forward										rrnL	rRNA	10967	11530	564	reverse
G	Polymorphism	13265	13265	1	none			A -> G		10	SNP (transition)		1	1e-36																G	Polymorphism	11237	11237	1	none	A -> G	84	SNP (transition)	1	1e-294
G	Polymorphism	13293	13293	1	none			A -> G		19	SNP (transition)		1	4e-69																C	Polymorphism	11282	11282	1	none	T -> C	68	SNP (transition)	1	4e-225
tRNA-Tyr	tRNA	13729	13791	63	reverse																									rrnL	rRNA	11589	11616	28	reverse
tRNA-Gln	tRNA	13788	13847	60	reverse																									G	Polymorphism	11623	11623	1	none	A -> G	48	SNP (transition)	1	1e-168
tRNA-Cys	tRNA	13850	13904	55	reverse																									A	Polymorphism	11697	11697	1	none	G -> A	44	SNP (transition)	1	4e-137
tRNA-Ile	tRNA	13942	14005	64	forward																									trnV(gta)	tRNA	11929	11982	54	reverse
tRNA-Met	tRNA	14008	14070	63	forward																									rrnS	rRNA	11975	12723	749	reverse
ND2 CDS	CDS	14071	15053	983	forward																									T	Polymorphism	12392	12392	1	none	C -> T	96	SNP (transition)	1	2.5e-298
A	Polymorphism	14965	14965	1	none	A -> T	895	G -> A	GCT -> ACT	55	SNP (transition)	Substitution	1	1e-187																G	Polymorphism	12920	12920	1	none	A -> G	29	SNP (transition)	0.931	6.4e-90
tRNA-Trp	tRNA	15054	15115	62	forward																									A	Polymorphism	12994	12994	1	none	T -> A	87	SNP (transversion)	0.989	3.5e-248
tRNA-Gly	tRNA	15114	15175	62	forward																									atp8-1	gene	13155	13274	120	reverse
																														G	Polymorphism	13189	13189	1	none	A -> G	53	SNP (transition)	1	3.2e-186
																														C	Polymorphism	13205	13205	1	none	T -> C	51	SNP (transition)	1	3.2e-179
																														G	Polymorphism	13633	13633	1	none	A -> G	28	SNP (transition)	1	4e-93
																														T	Polymorphism	13760	13760	1	none	C -> T	61	SNP (transition)	0.918	1.9e-72
																														C	Polymorphism	13787	13787	1	none	T -> C	166	SNP (transition)	0.38	5.3e-27
																														trnY(tac)	tRNA	13787	13846	60	reverse
																														trnQ(caa)	tRNA	13847	13903	57	reverse
																														G	Polymorphism	13918	13918	1	none	A -> G	55	SNP (transition)	0.945	6.3e-90
																														C	Polymorphism	13926	13926	1	none	G -> C	42	SNP (transversion)	0.976	8.2e-69
																														G	Polymorphism	14022	14022	1	none	A -> G	41	SNP (transition)	1	6.3e-50
																														trnQ(caa)	tRNA	14037	14097	61	reverse
																														G	Polymorphism	14038	14037	0	none	#NAME?	77	Insertion	0.312	1.7e-15
																														trnC(tgc)	tRNA	14097	14153	57	reverse
																														trnI(atc)	tRNA	14228	14291	64	forward
																														trnM(atg)	tRNA	14295	14356	62	forward
																														nad2	gene	14387	15307	921	forward
																														C	Polymorphism	14764	14764	1	none	T -> C	61	SNP (transition)	1	5e-202
																														T	Polymorphism	14824	14824	1	none	C -> T	133	SNP (transition)	0.97	0
																														A	Polymorphism	14845	14845	1	none	G -> A	131	SNP (transition)	1	0
																														C	Polymorphism	14994	14994	1	none	T -> C	89	SNP (transition)	1	3.2E-312
																														G	Polymorphism	15023	15023	1	none	A -> G	93	SNP (transition)	0.968	1.3e-292
																														trnW(tga)	tRNA	15339	15399	61	forward
																														trnG(gga)	tRNA	15400	15460	61	forward

## Sheet: Table S3
Summary Statistic	12S	16S	ATP6	ATP8	COX2	COX3	CytB	ND1	ND2	ND3	ND4	ND4L	ND5	ND6
mean	0.0142	0.0124	0.0178	0.0219	0.0151	0.0159	0.0159	0.0183	0.0168	0.0167	0.0158	0.0156	0.0173	0.0202
stderr of mean	1.6541e-05	1.4474e-05	2.1109e-05	3.0776e-05	1.9659e-05	1.8342e-05	1.9242e-05	2.2888e-05	1.8914e-05	2.0782e-05	1.7715e-05	2.2367e-05	1.9881e-05	2.3739e-05
stdev	0.0010393	0.00089016	0.0014607	0.0023598	0.0012747	0.0012451	0.0011273	0.0013626	0.001125	0.0015449	0.0010554	0.0014486	0.0010916	0.0015113
variance	1.0802e-06	7.9239e-07	2.1338e-06	5.5688e-06	1.6248e-06	1.5503e-06	1.2708e-06	1.8566e-06	1.2656e-06	2.3868e-06	1.1138e-06	2.0984e-06	1.1915e-06	2.284e-06
median	0.0142	0.0124	0.0177	0.0218	0.015	0.0159	0.0159	0.0183	0.0168	0.0166	0.0158	0.0155	0.0173	0.0201
value range	[0.0104, 0.0193]	[9.2713E-3, 0.017]	[0.0128, 0.0244]	[0.0141, 0.0351]	[0.0103, 0.0208]	[0.0113, 0.0223]	[0.0122, 0.0211]	[0.0137, 0.025]	[0.013, 0.0226]	[0.0116, 0.0246]	[0.0123, 0.0208]	[0.0105, 0.0233]	[0.0137, 0.0222]	[0.0149, 0.0278]
geometric mean	0.0142	0.0124	0.0177	0.0218	0.015	0.0158	0.0159	0.0183	0.0168	0.0166	0.0158	0.0156	0.0173	0.0201
95% HPD interval	[0.0122, 0.0163]	[0.0107, 0.0142]	[0.0149, 0.0206]	[0.0174, 0.0265]	[0.0127, 0.0176]	[0.0134, 0.0183]	[0.0138, 0.0181]	[0.0158, 0.0211]	[0.0147, 0.019]	[0.0137, 0.0197]	[0.0137, 0.0179]	[0.0128, 0.0184]	[0.0152, 0.0195]	[0.0173, 0.0232]
auto-correlation time (ACT)	16976.8	17720.8	13997.4	11400.5	15944.3	14545.8	19528.9	18912.7	18947.6	12129.1	18887.5	15980.8	22235.7	16538.2
effective sample size (ESS)	3948.2	3782.4	4788.6	5879.4	4203.9	4608.1	3432.3	3544.1	3537.5	5526.2	3548.8	4194.3	3014.4	4052.9
number of samples	33514	33514	33514	33514	33514	33514	33514	33514	33514	33514	33514	33514	33514	33514
