# Supplementary material
Source: Preprints.org preprint supplement (doi:10.20944/preprints202109.0120.v1)

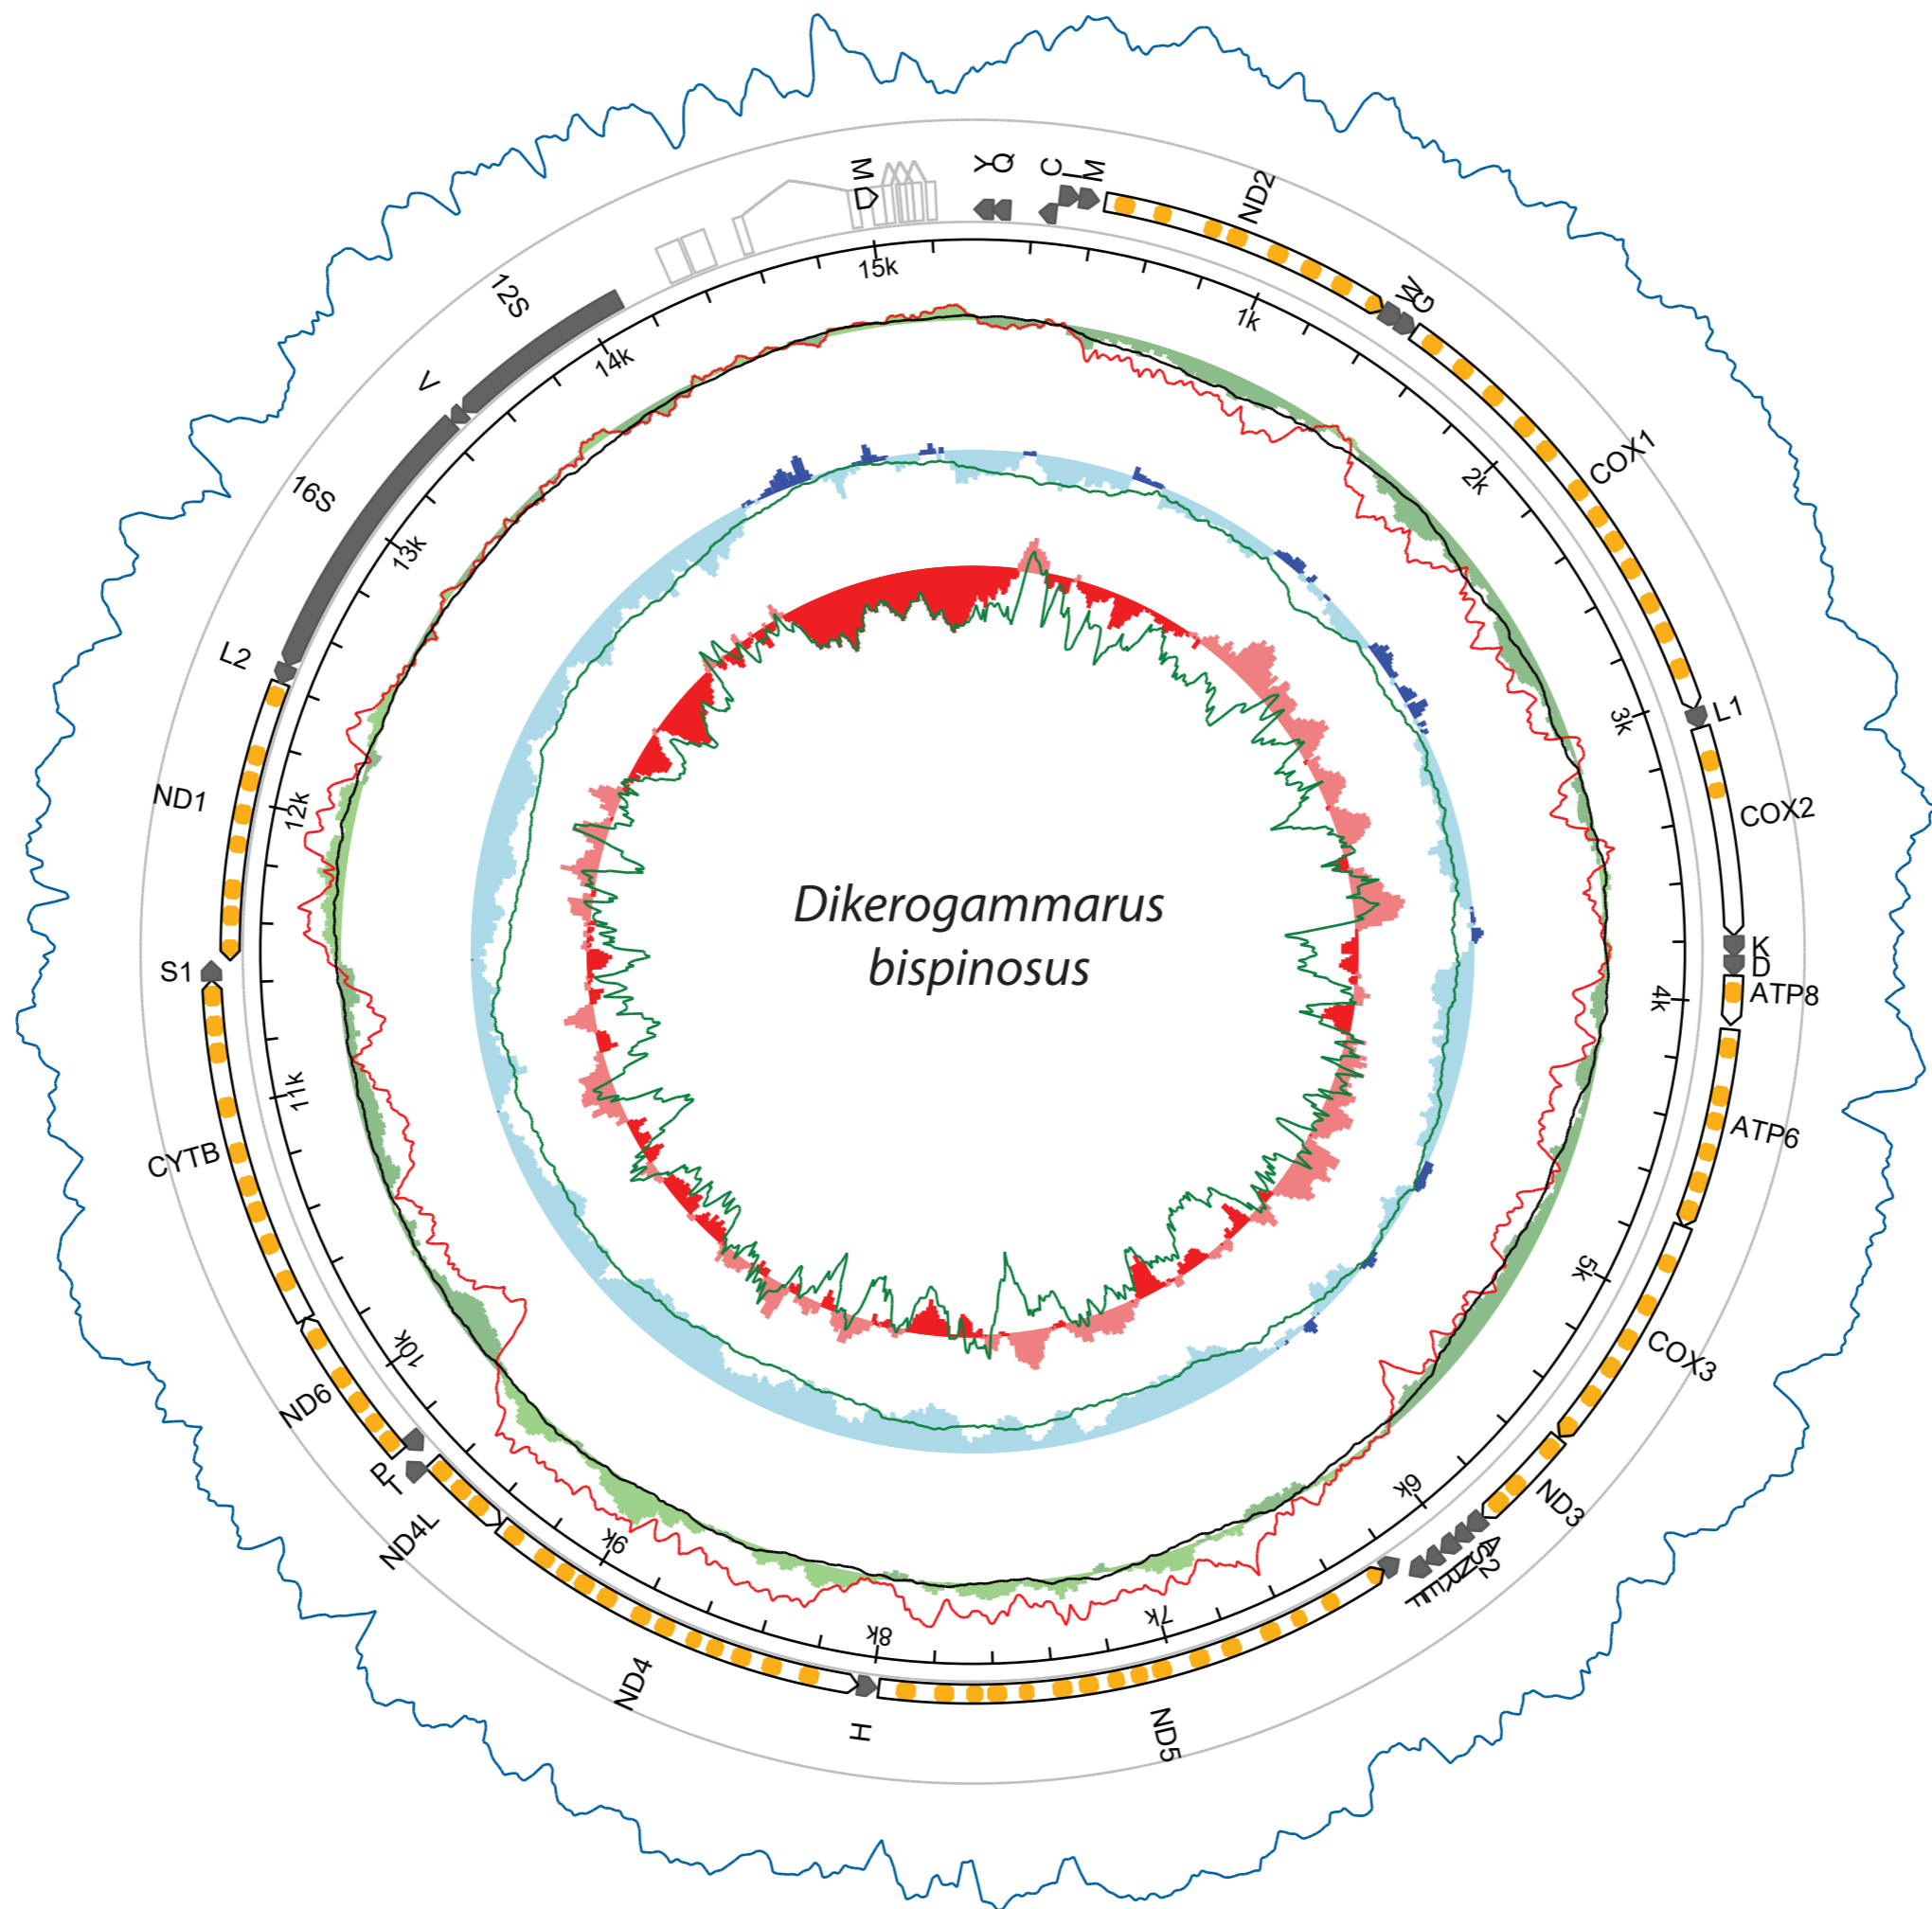

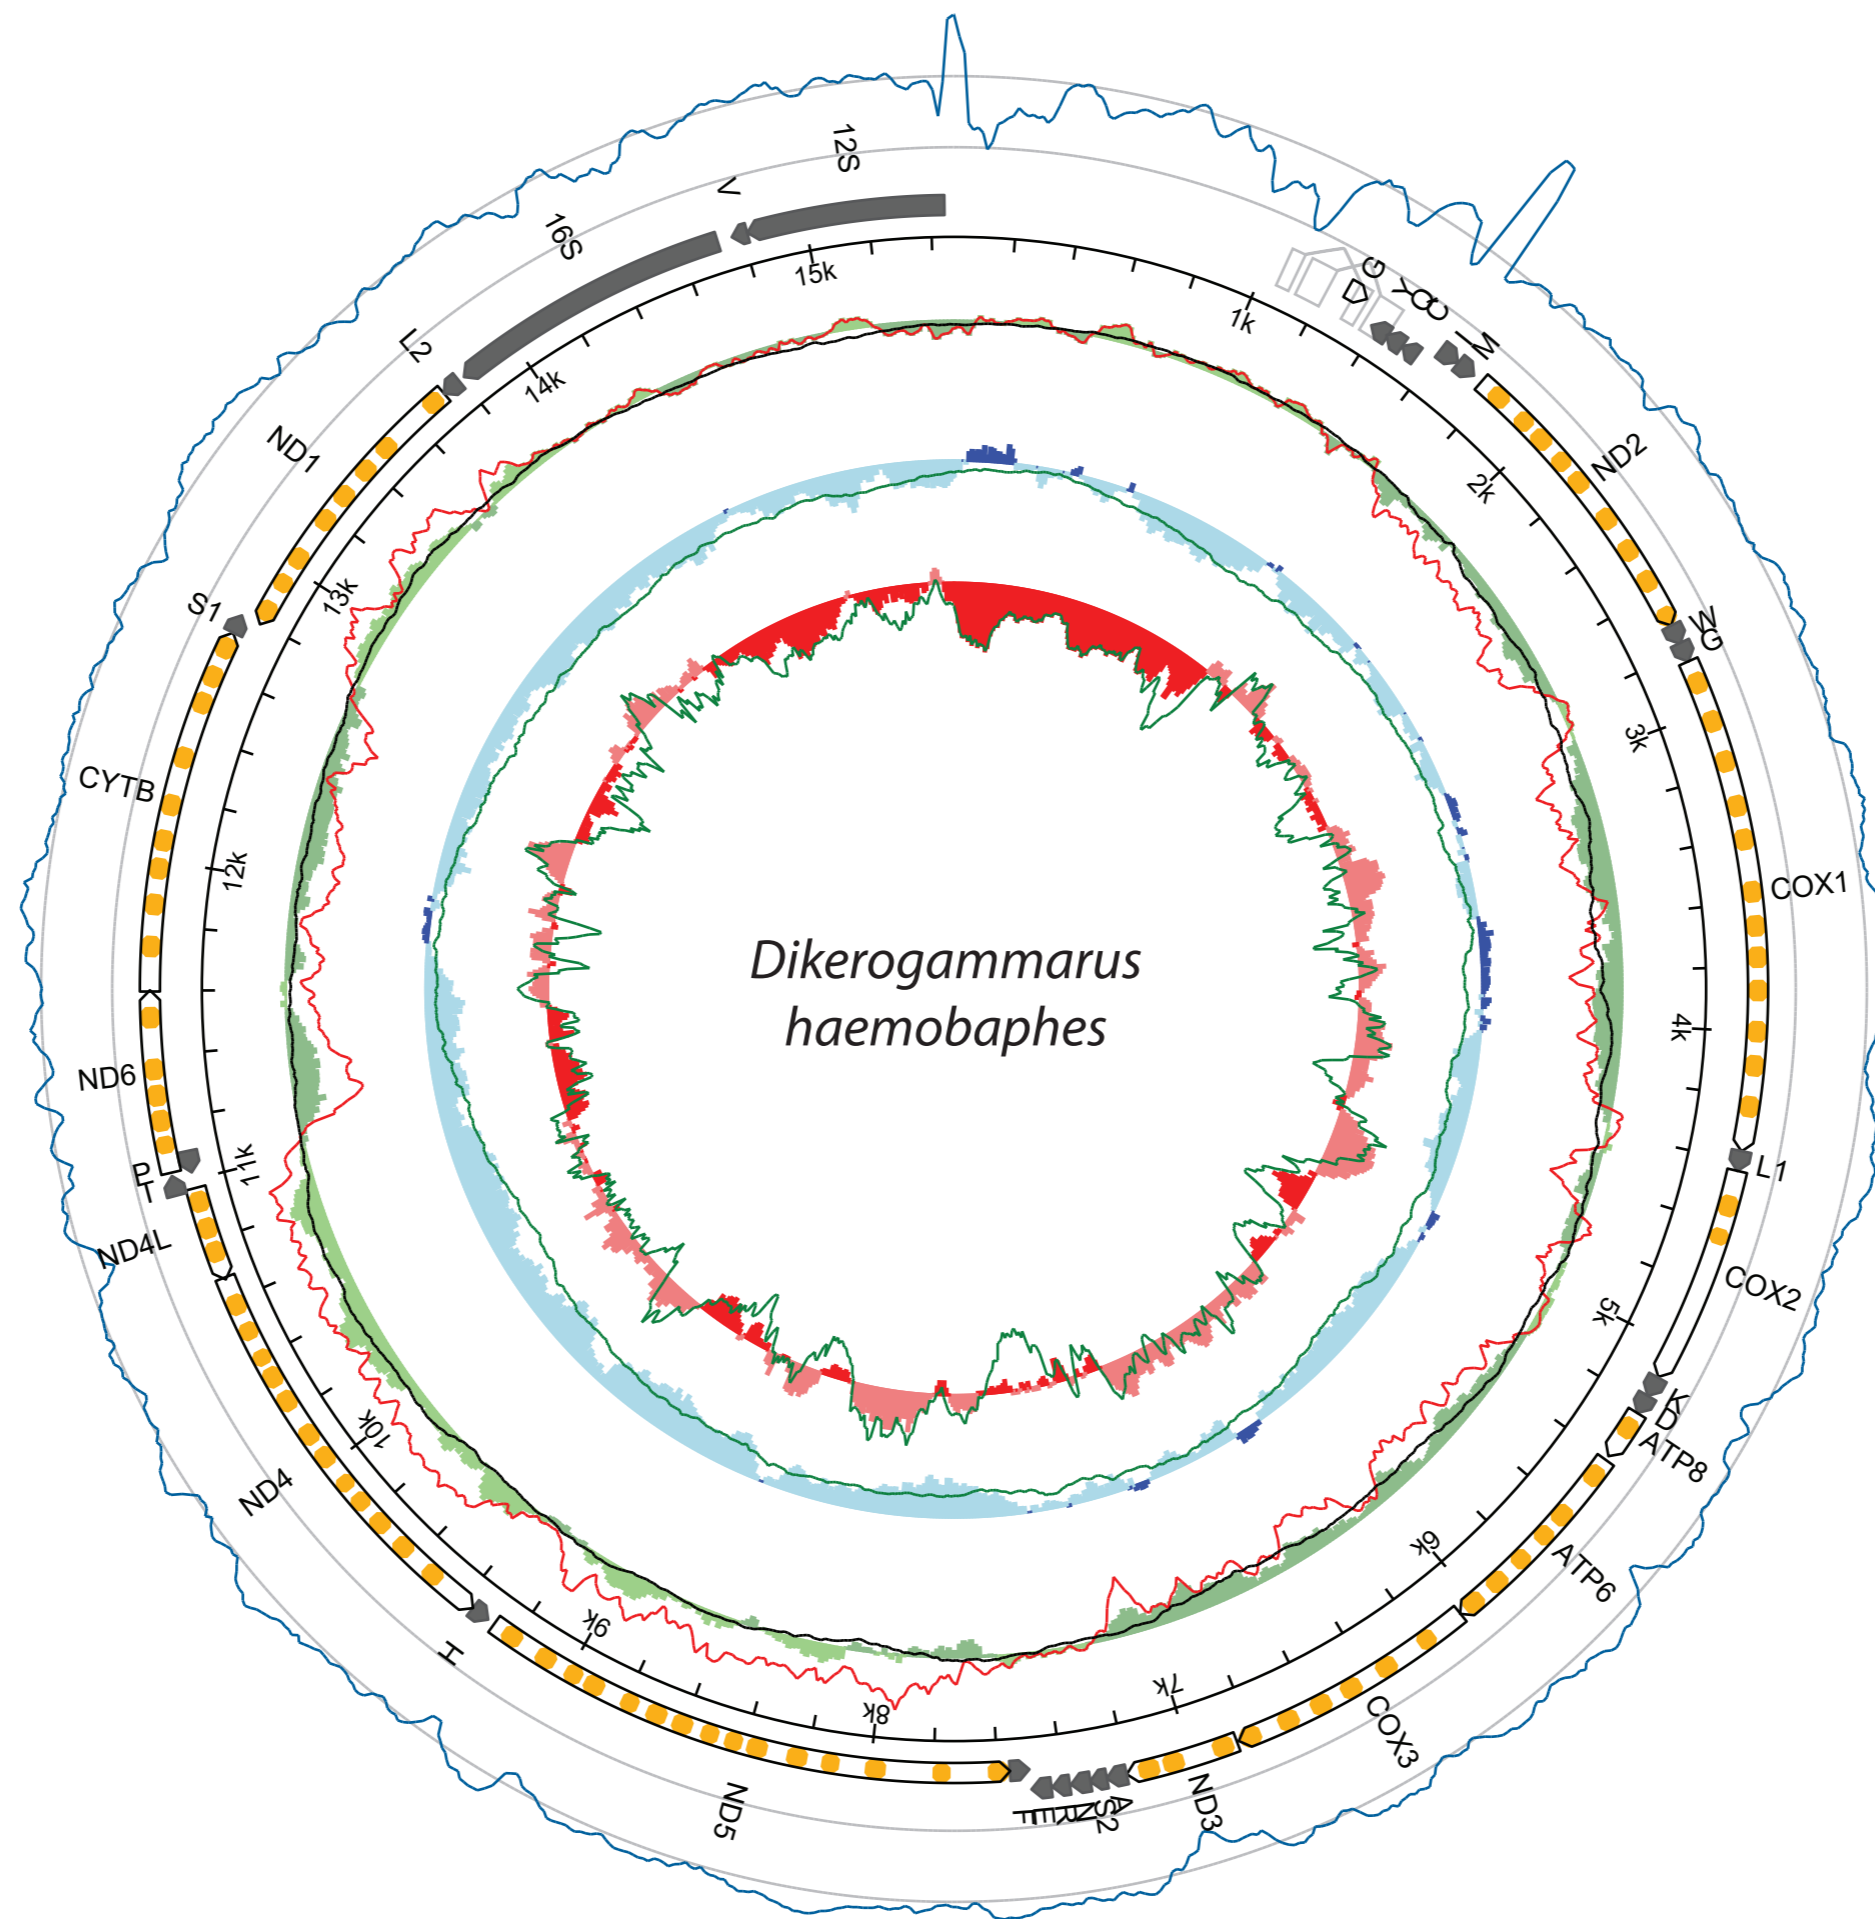

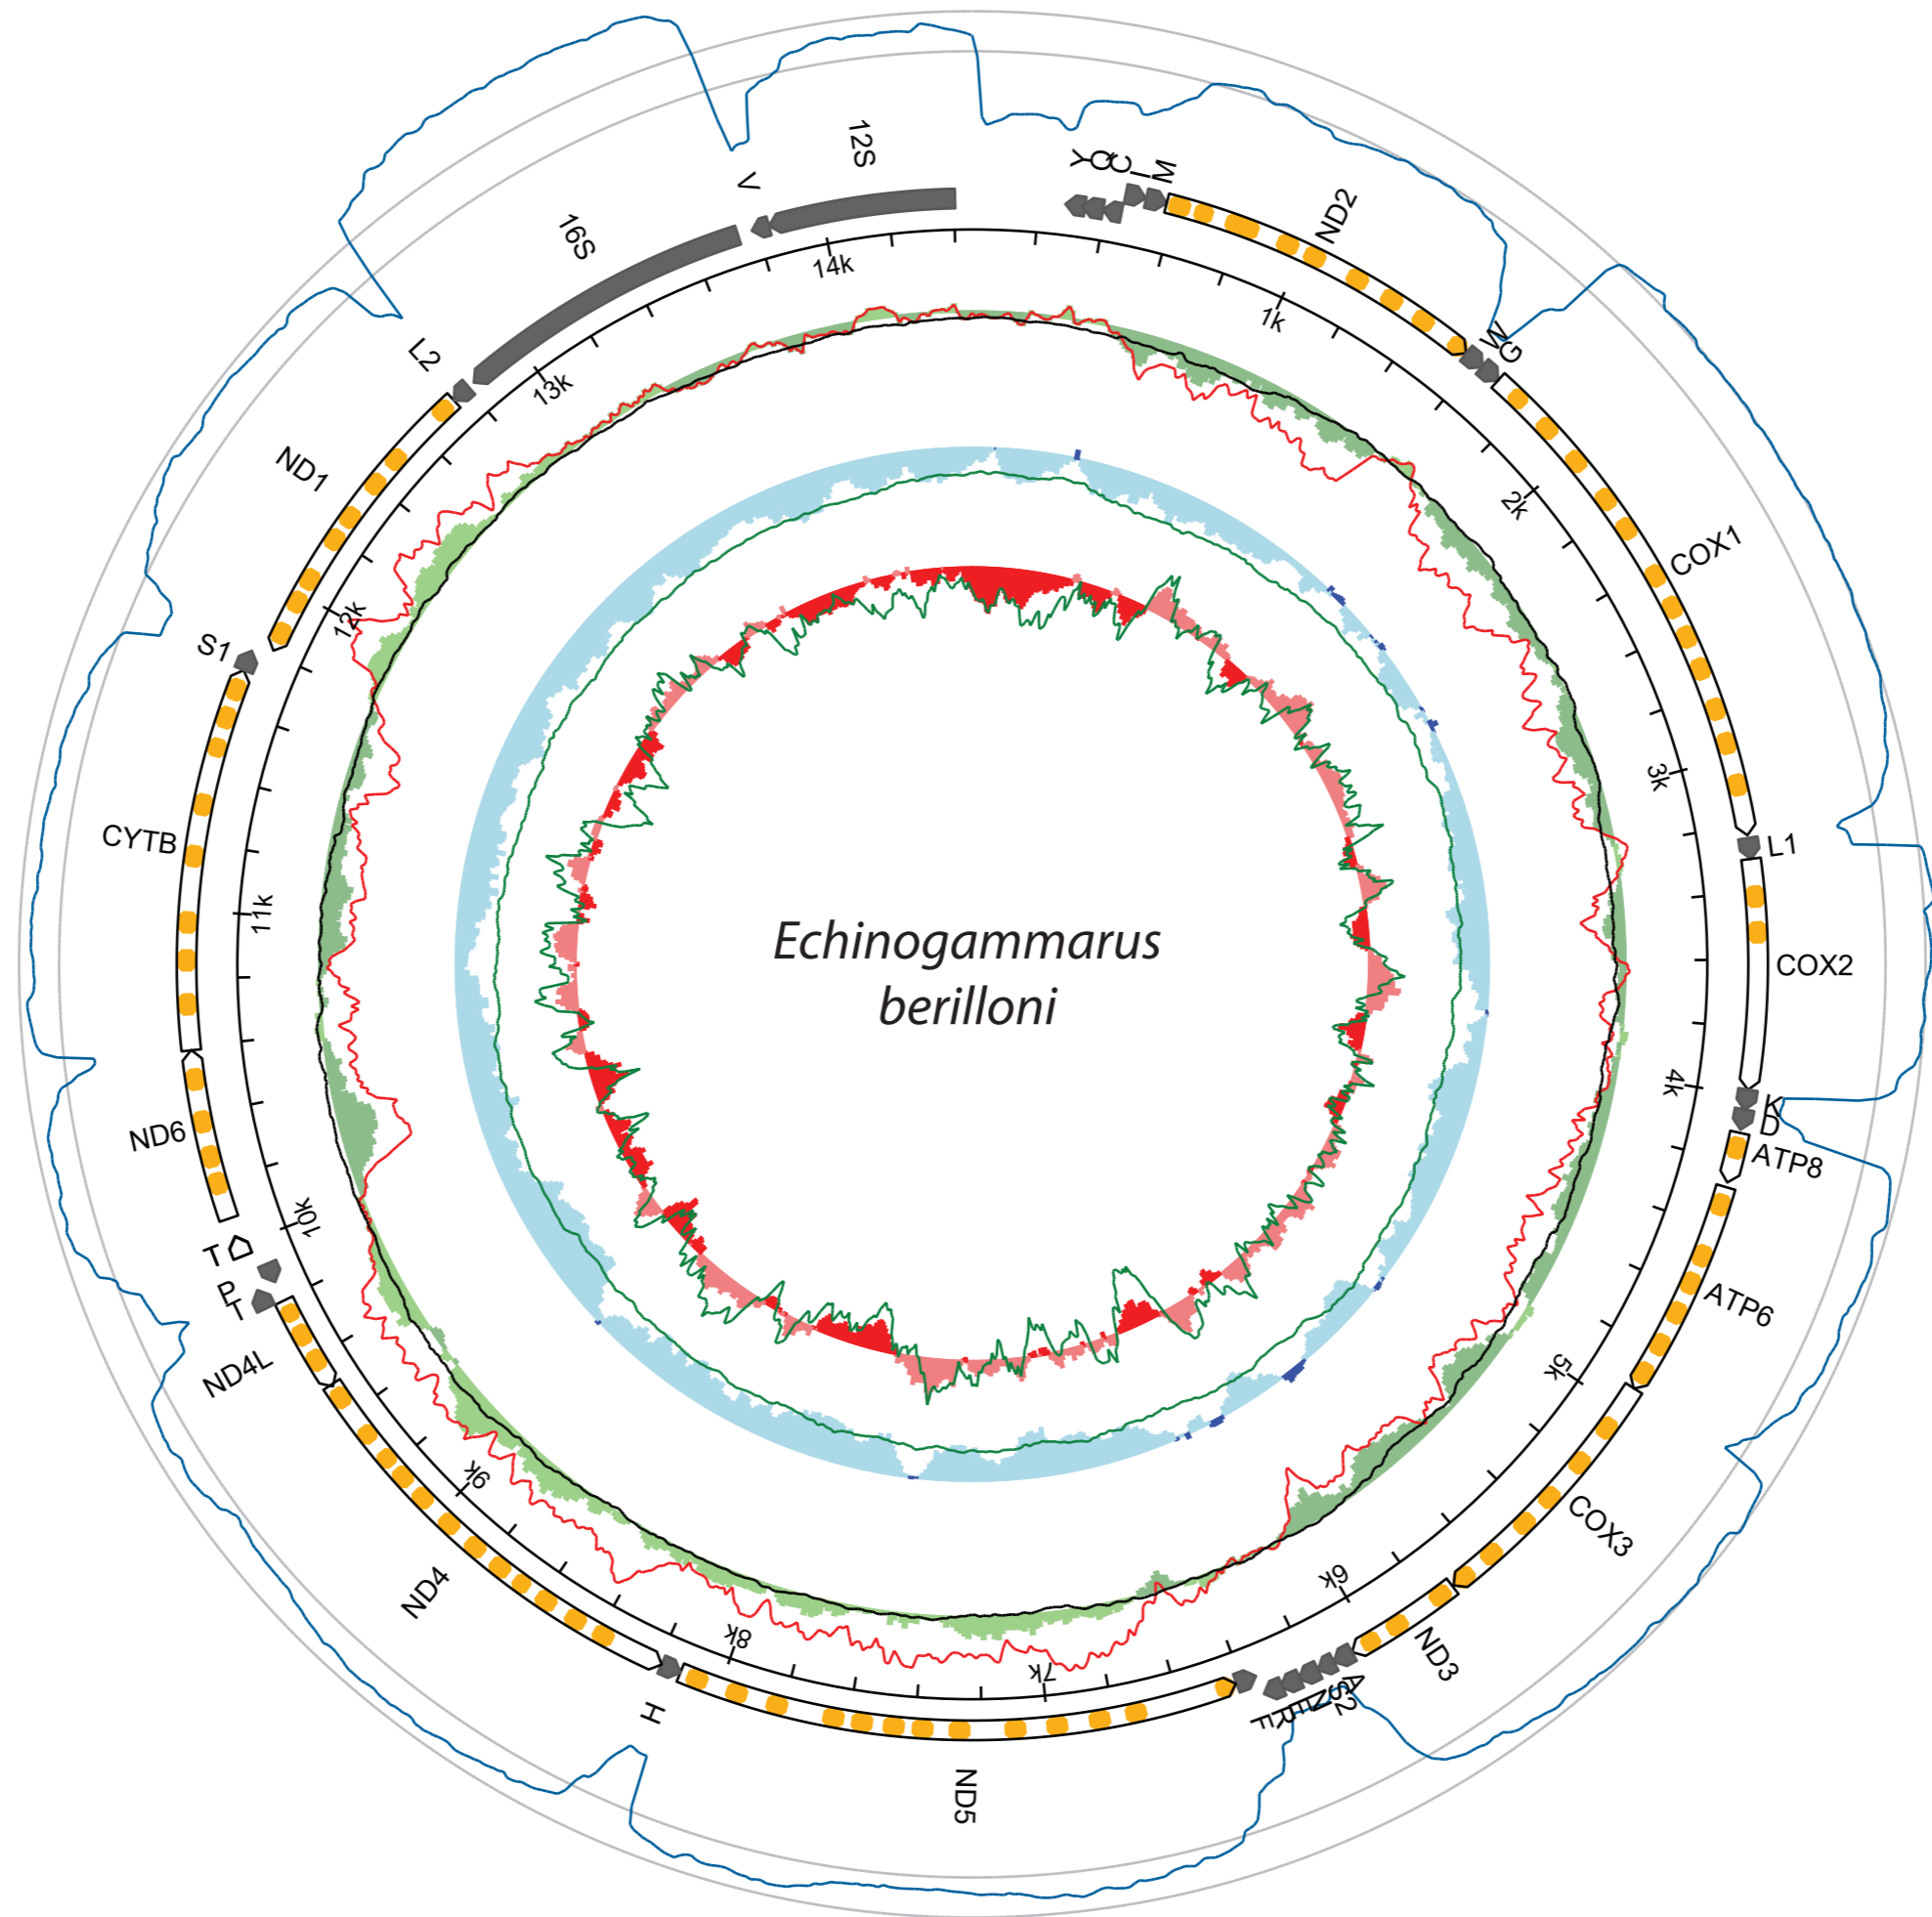

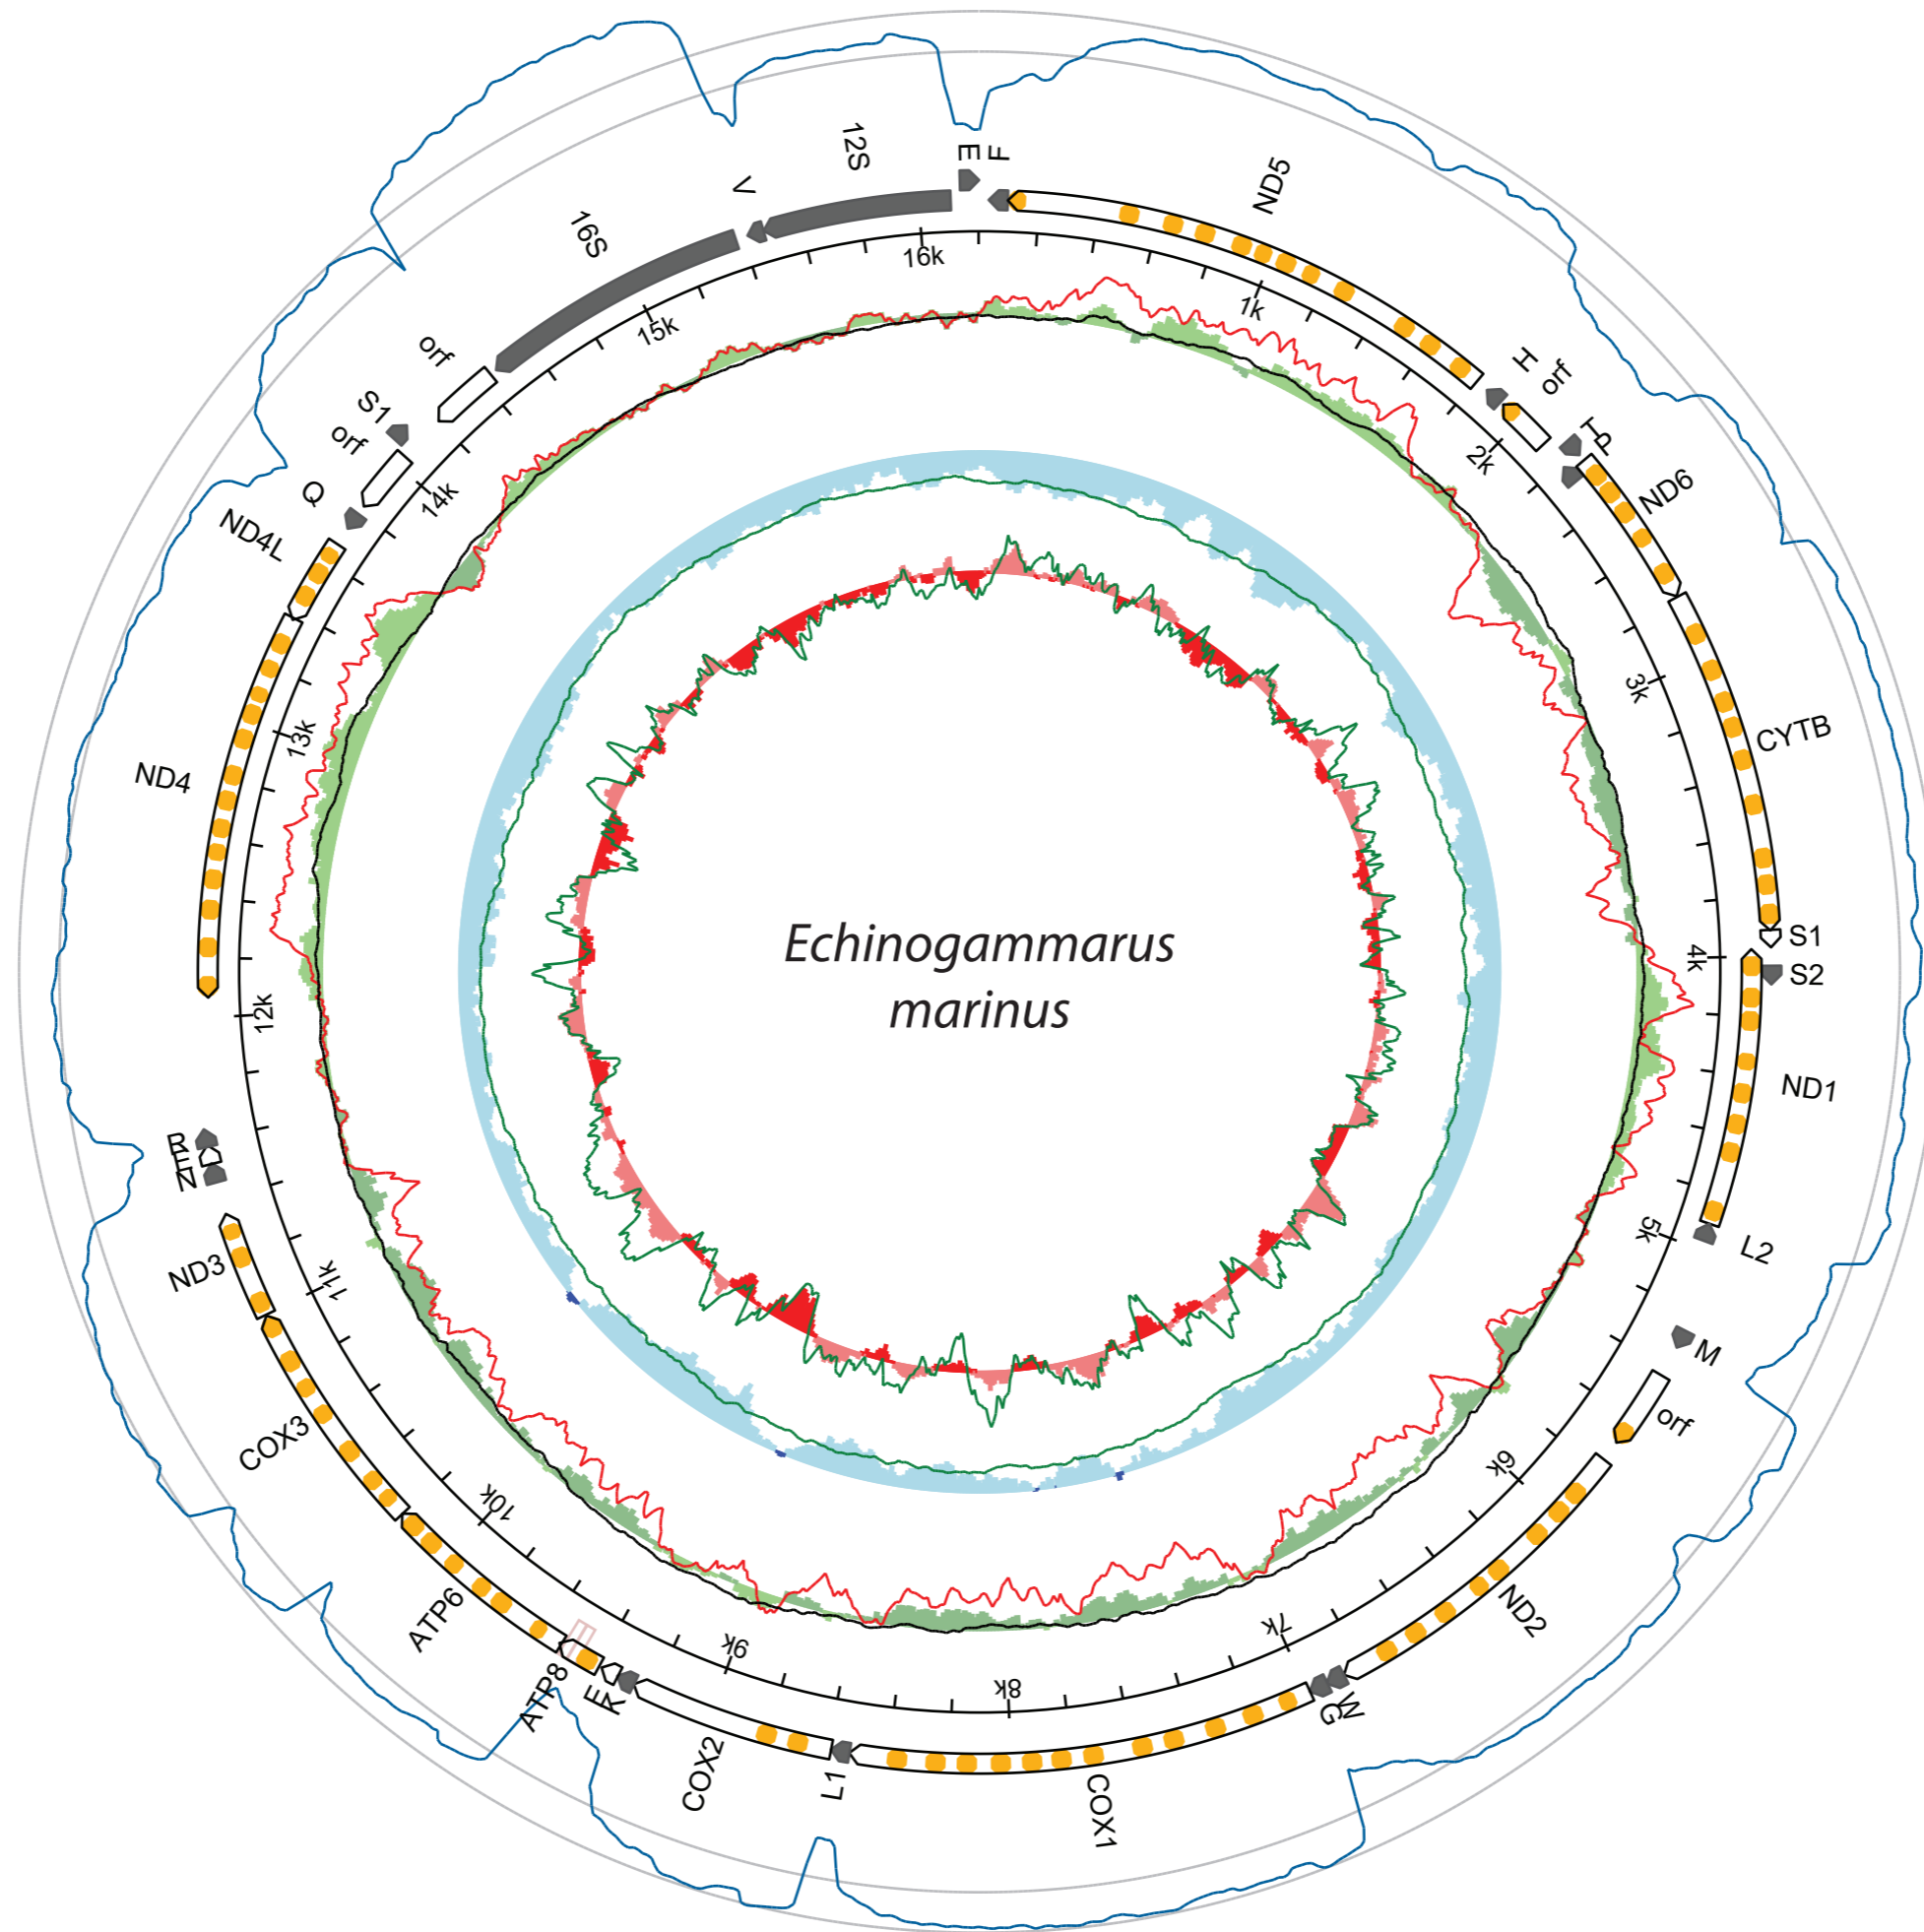

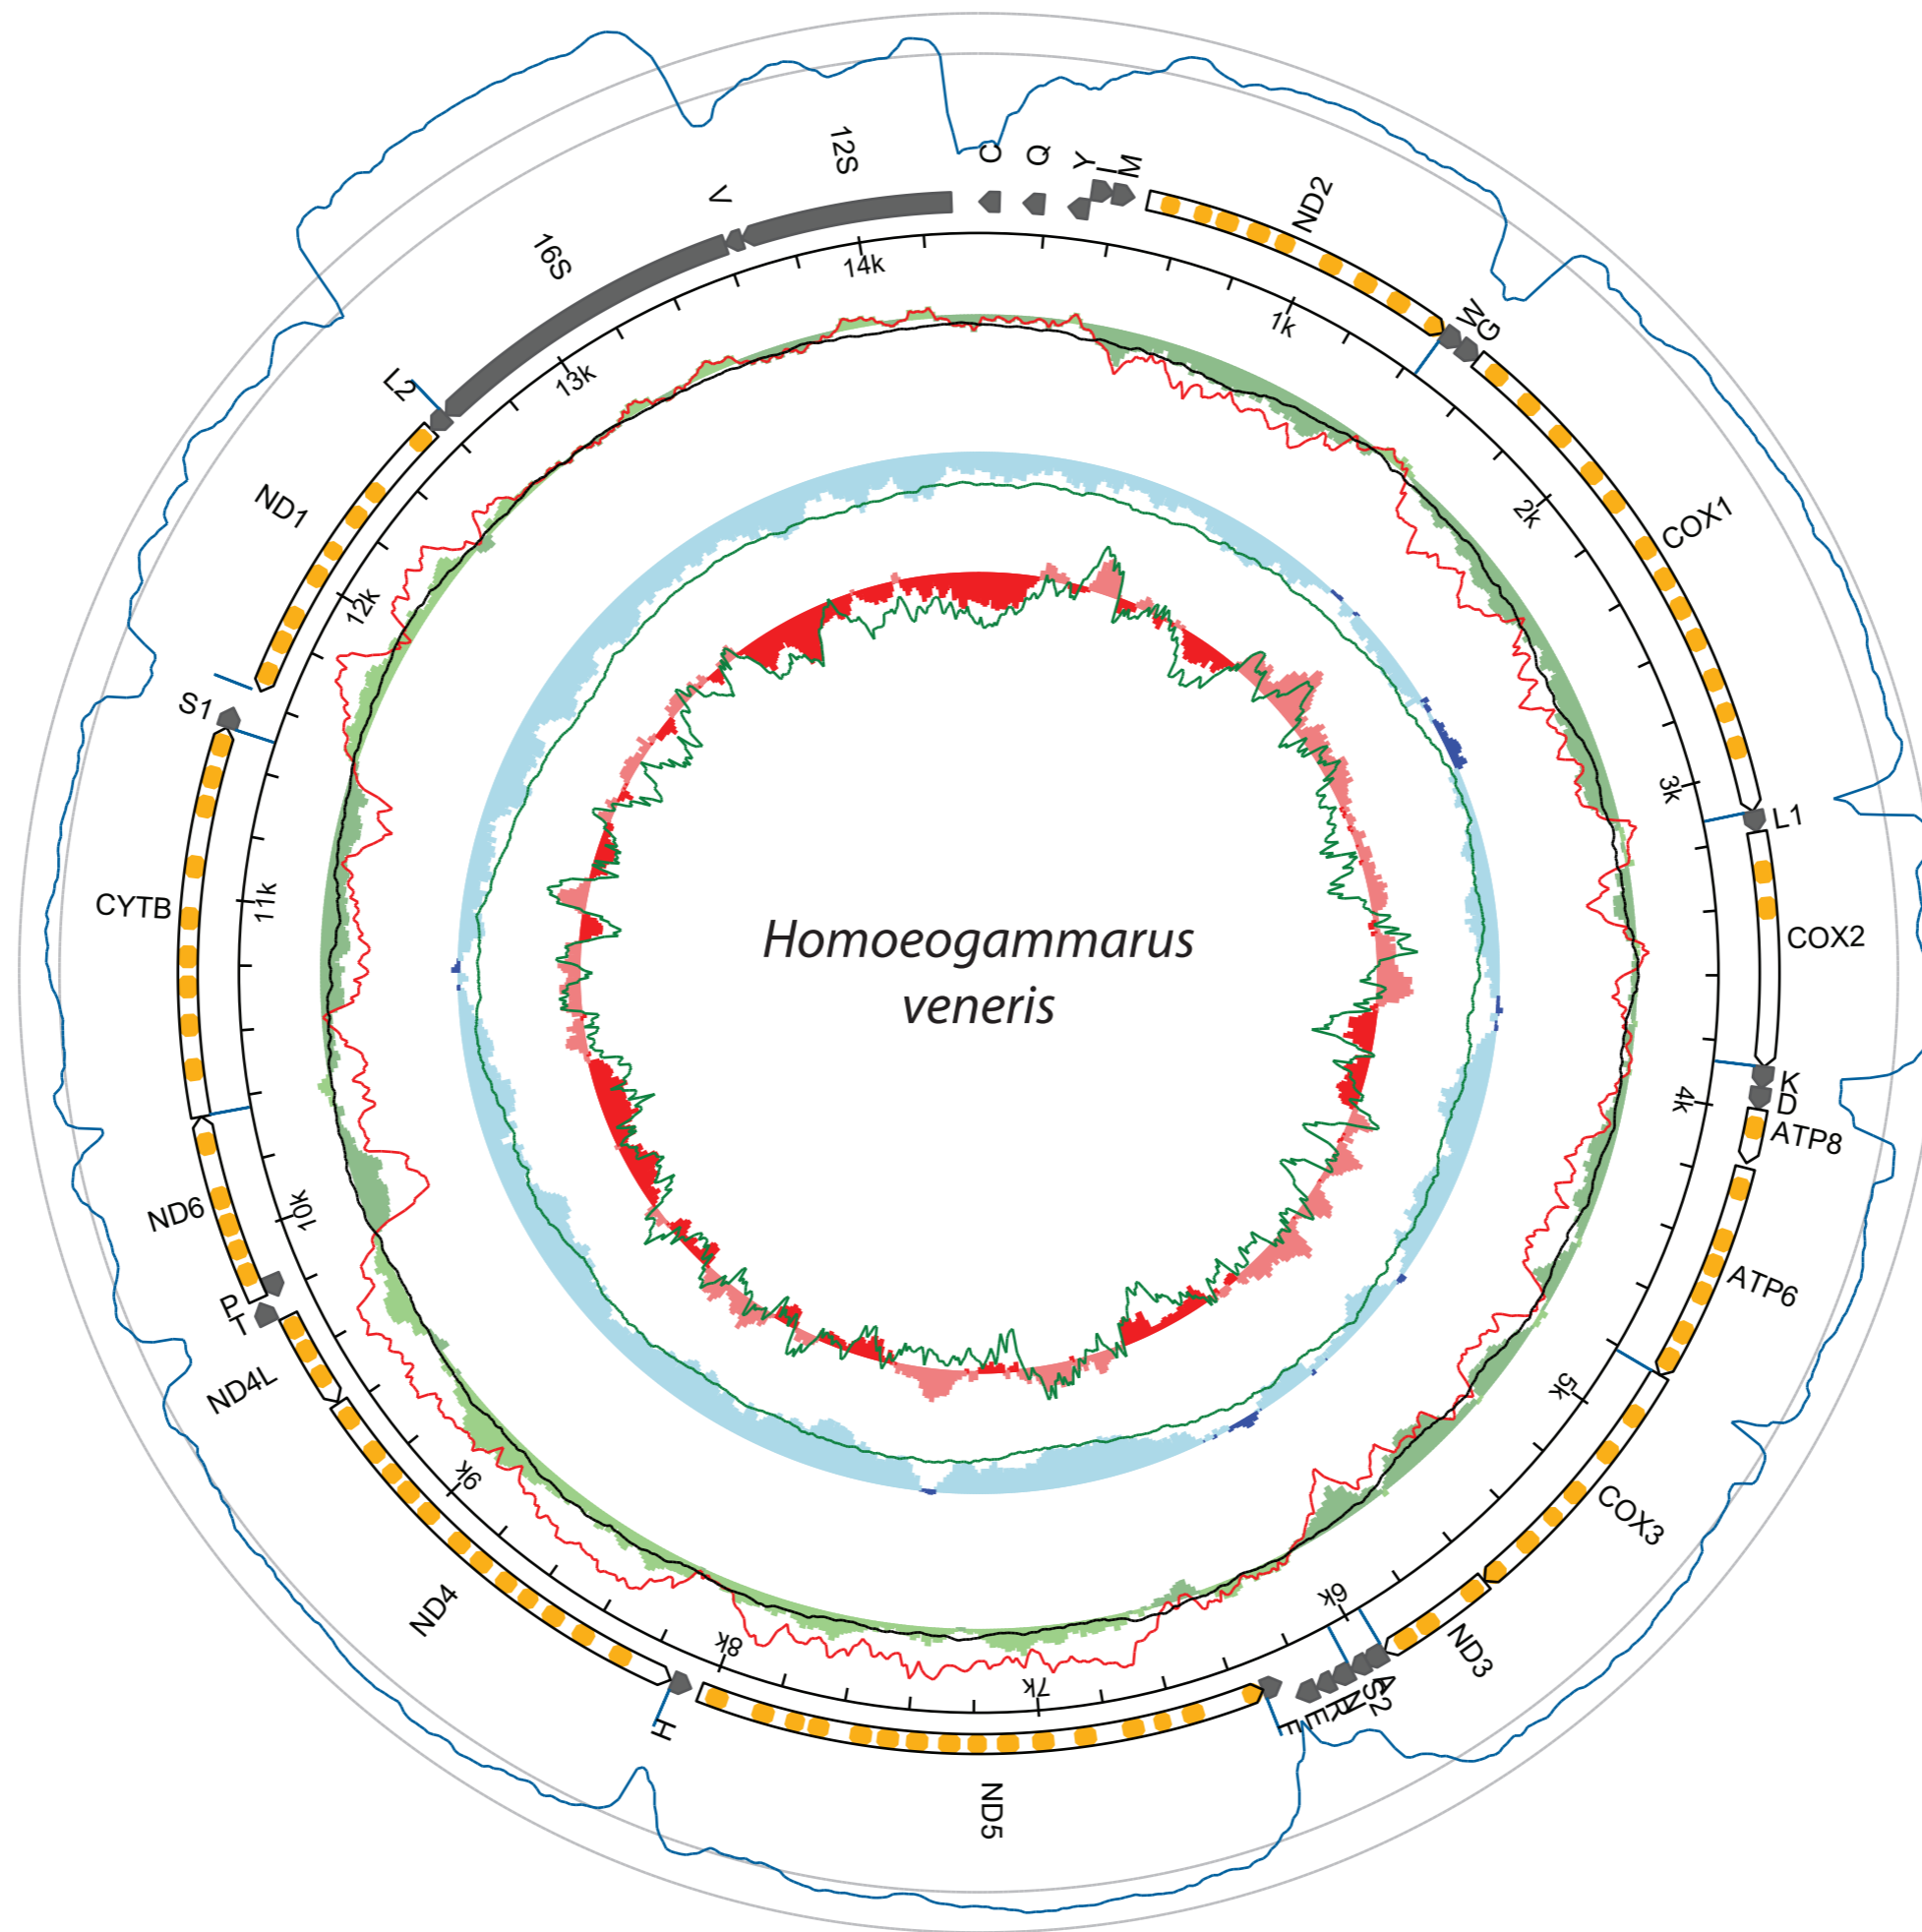

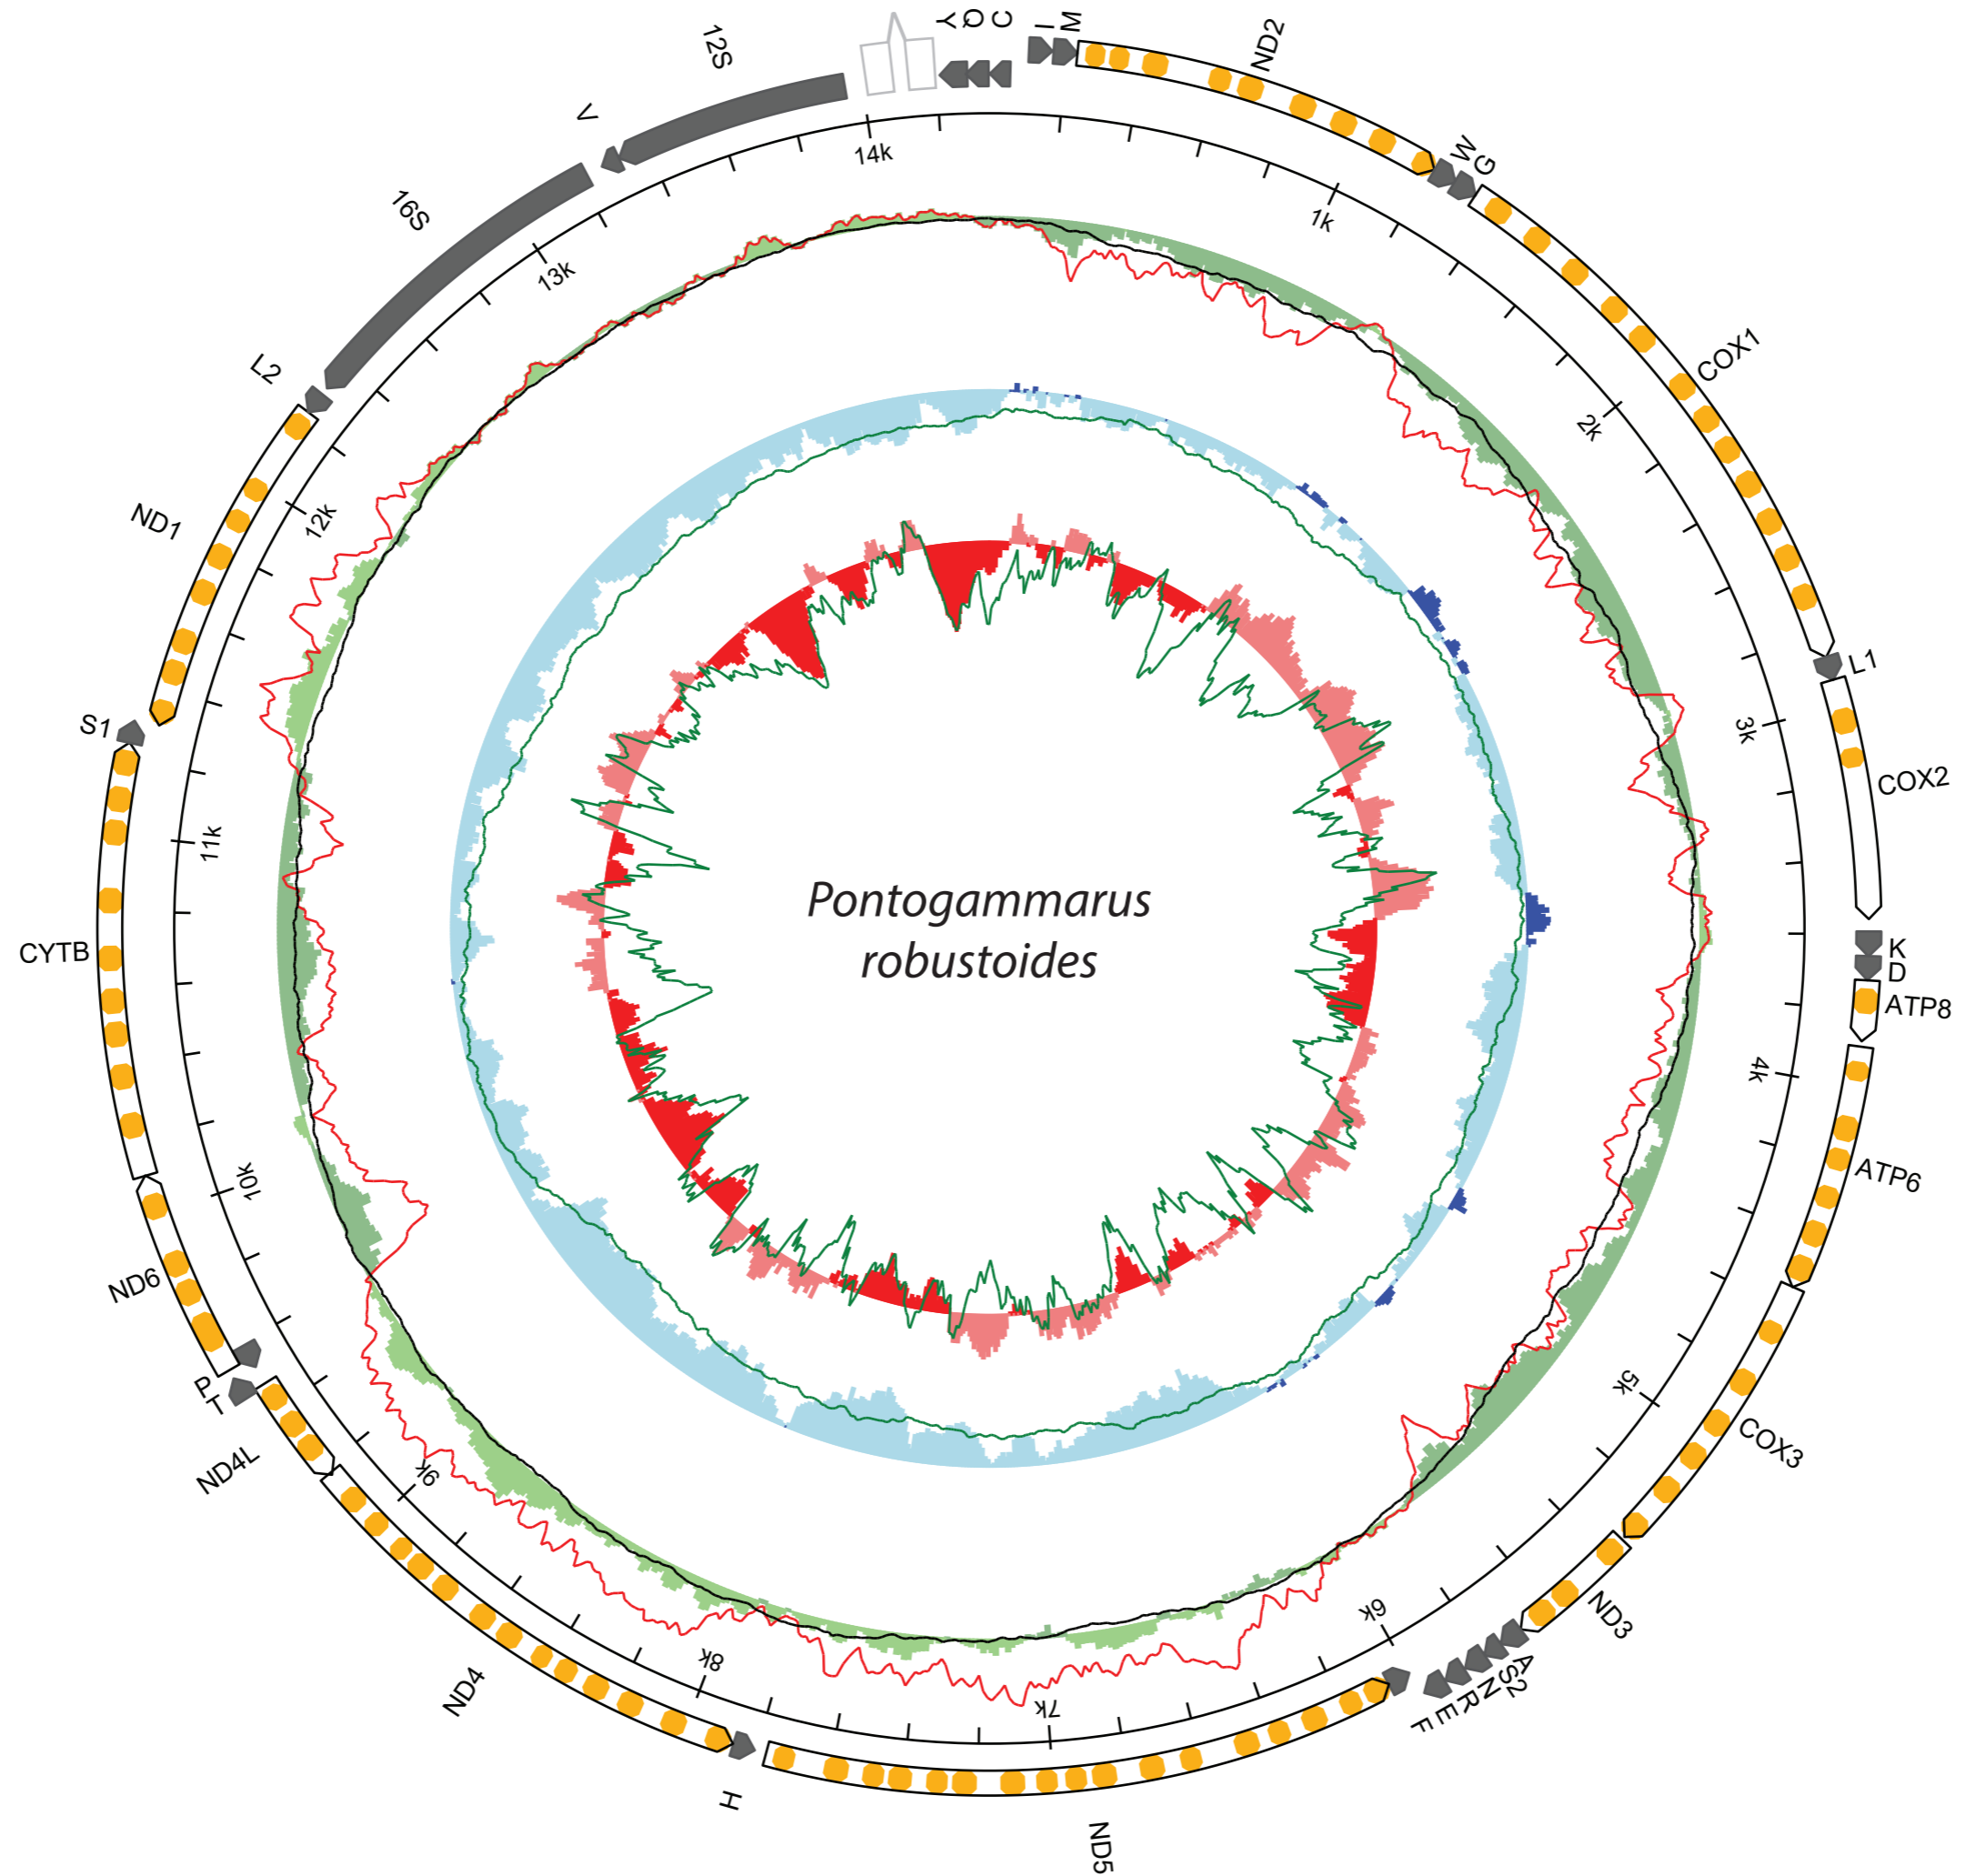

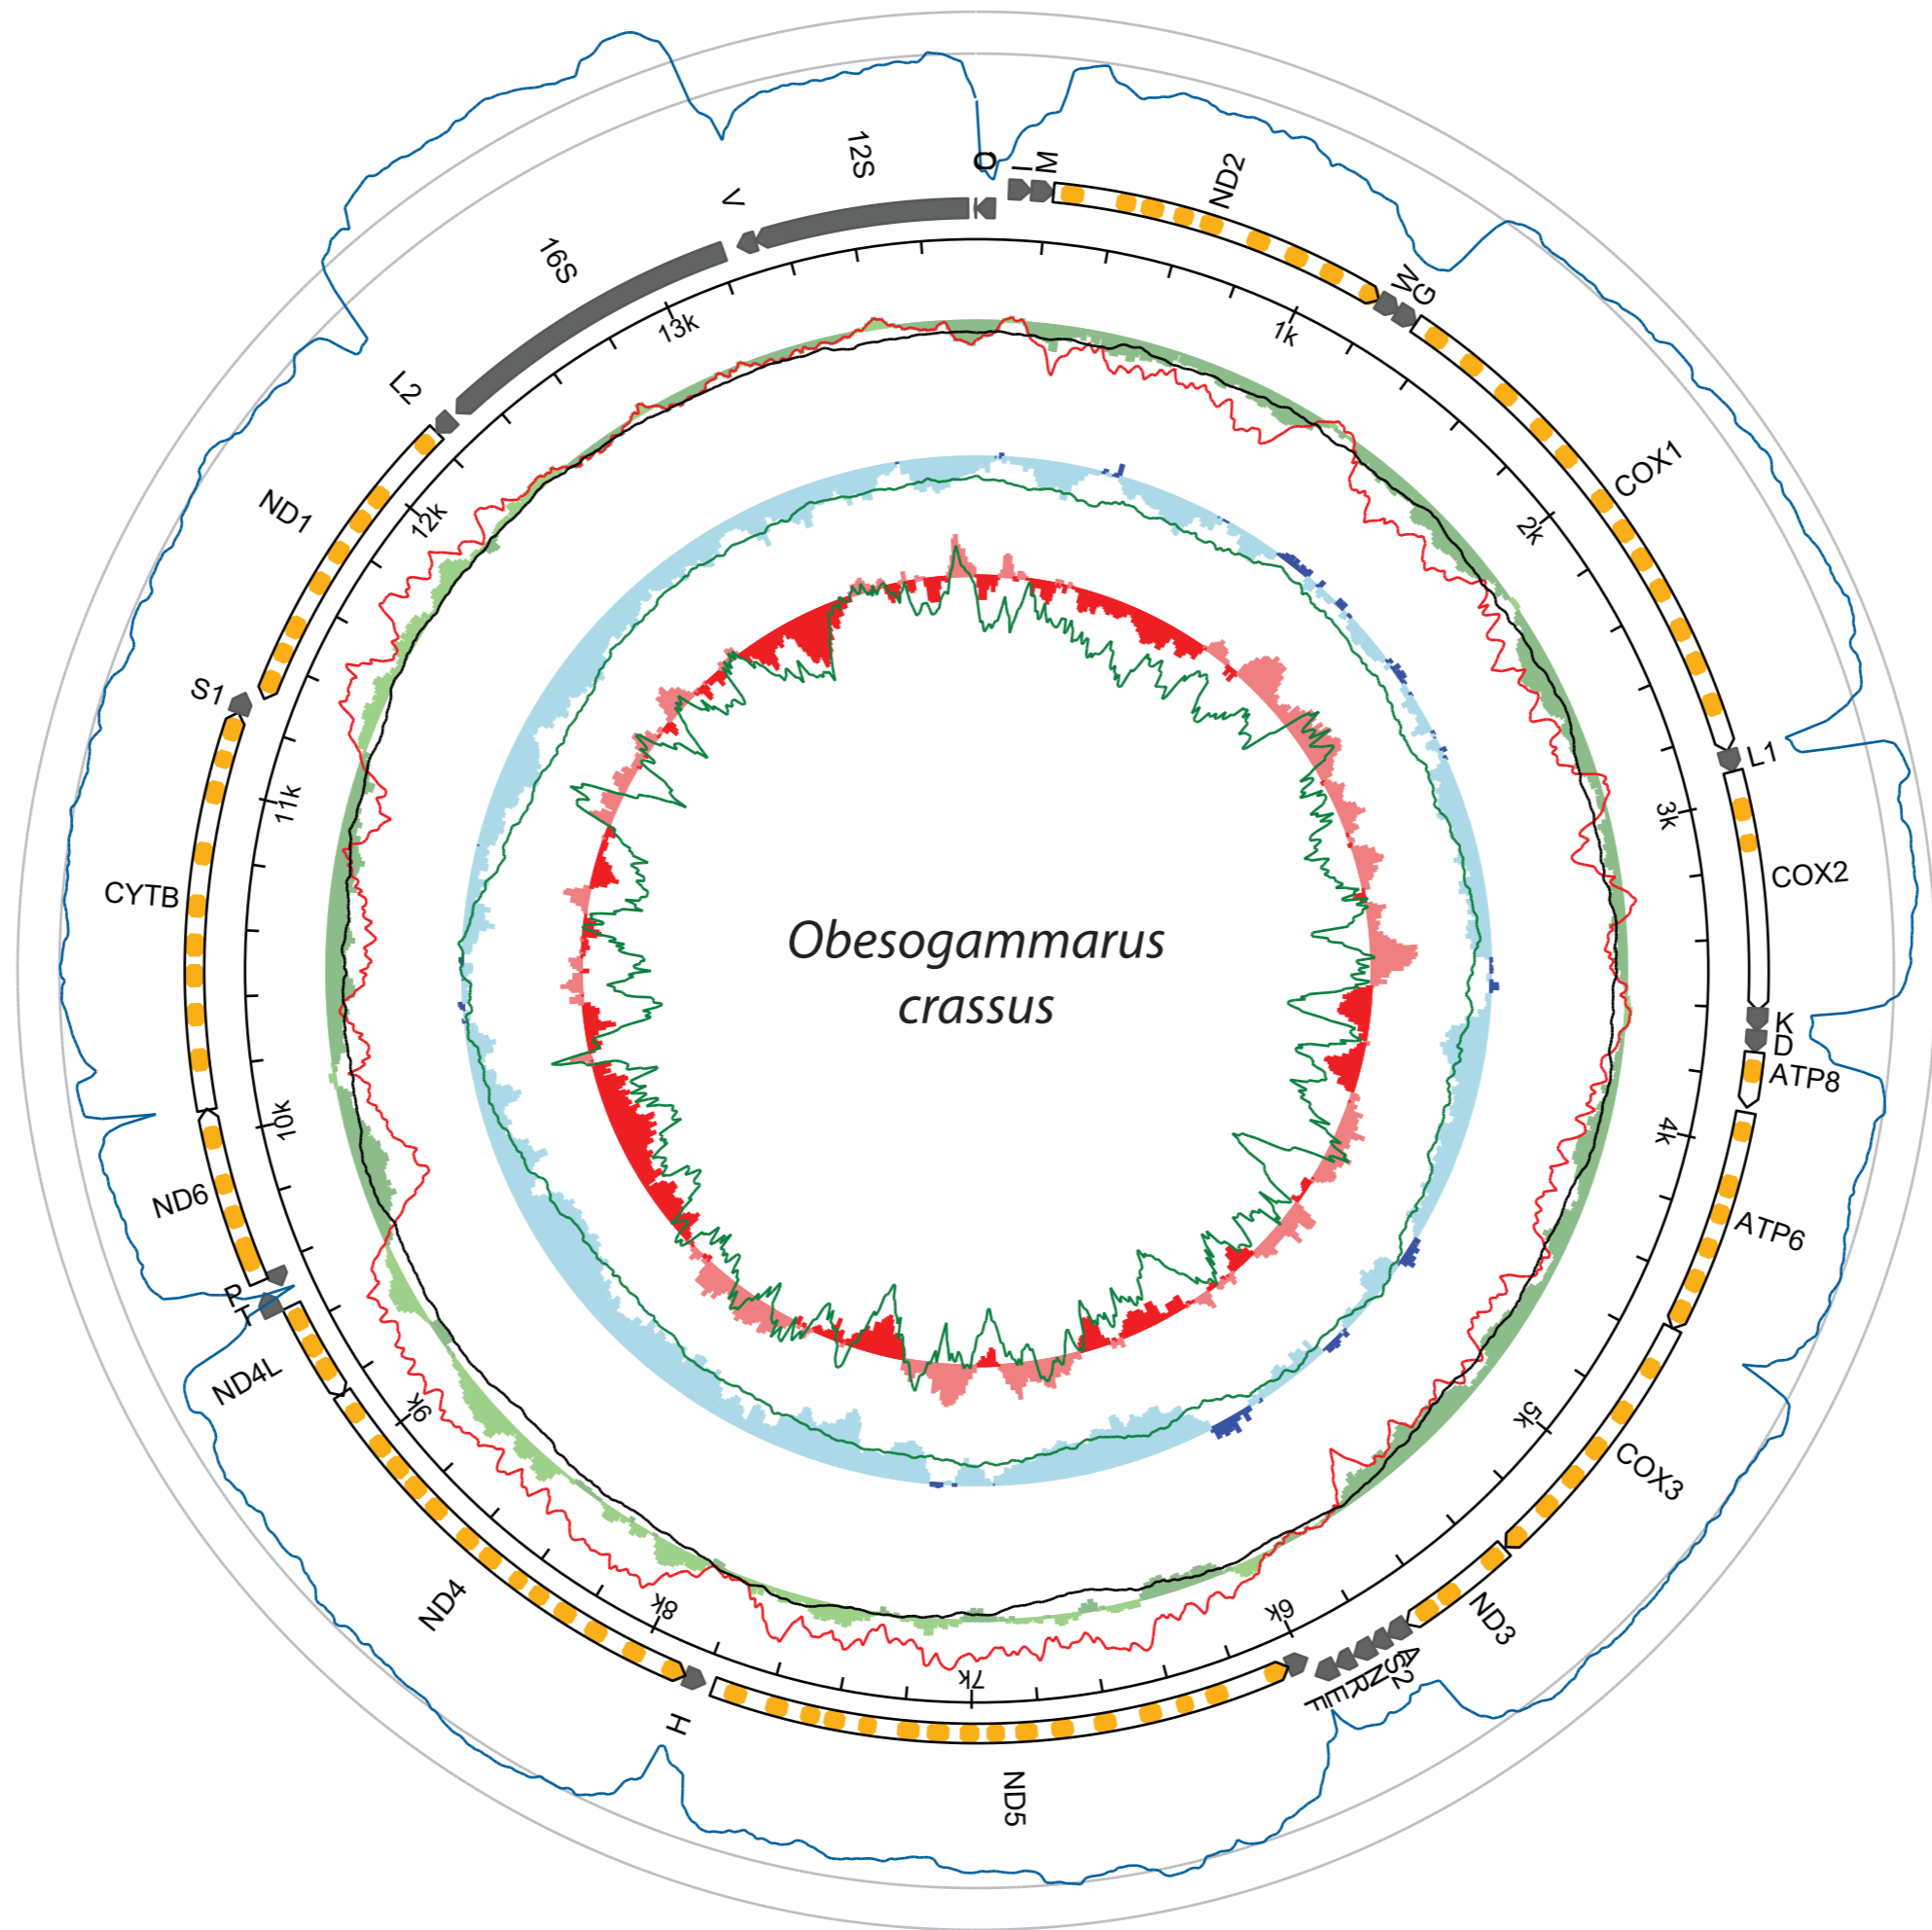

Supplement: Supplementary file 1 [file supplementary]

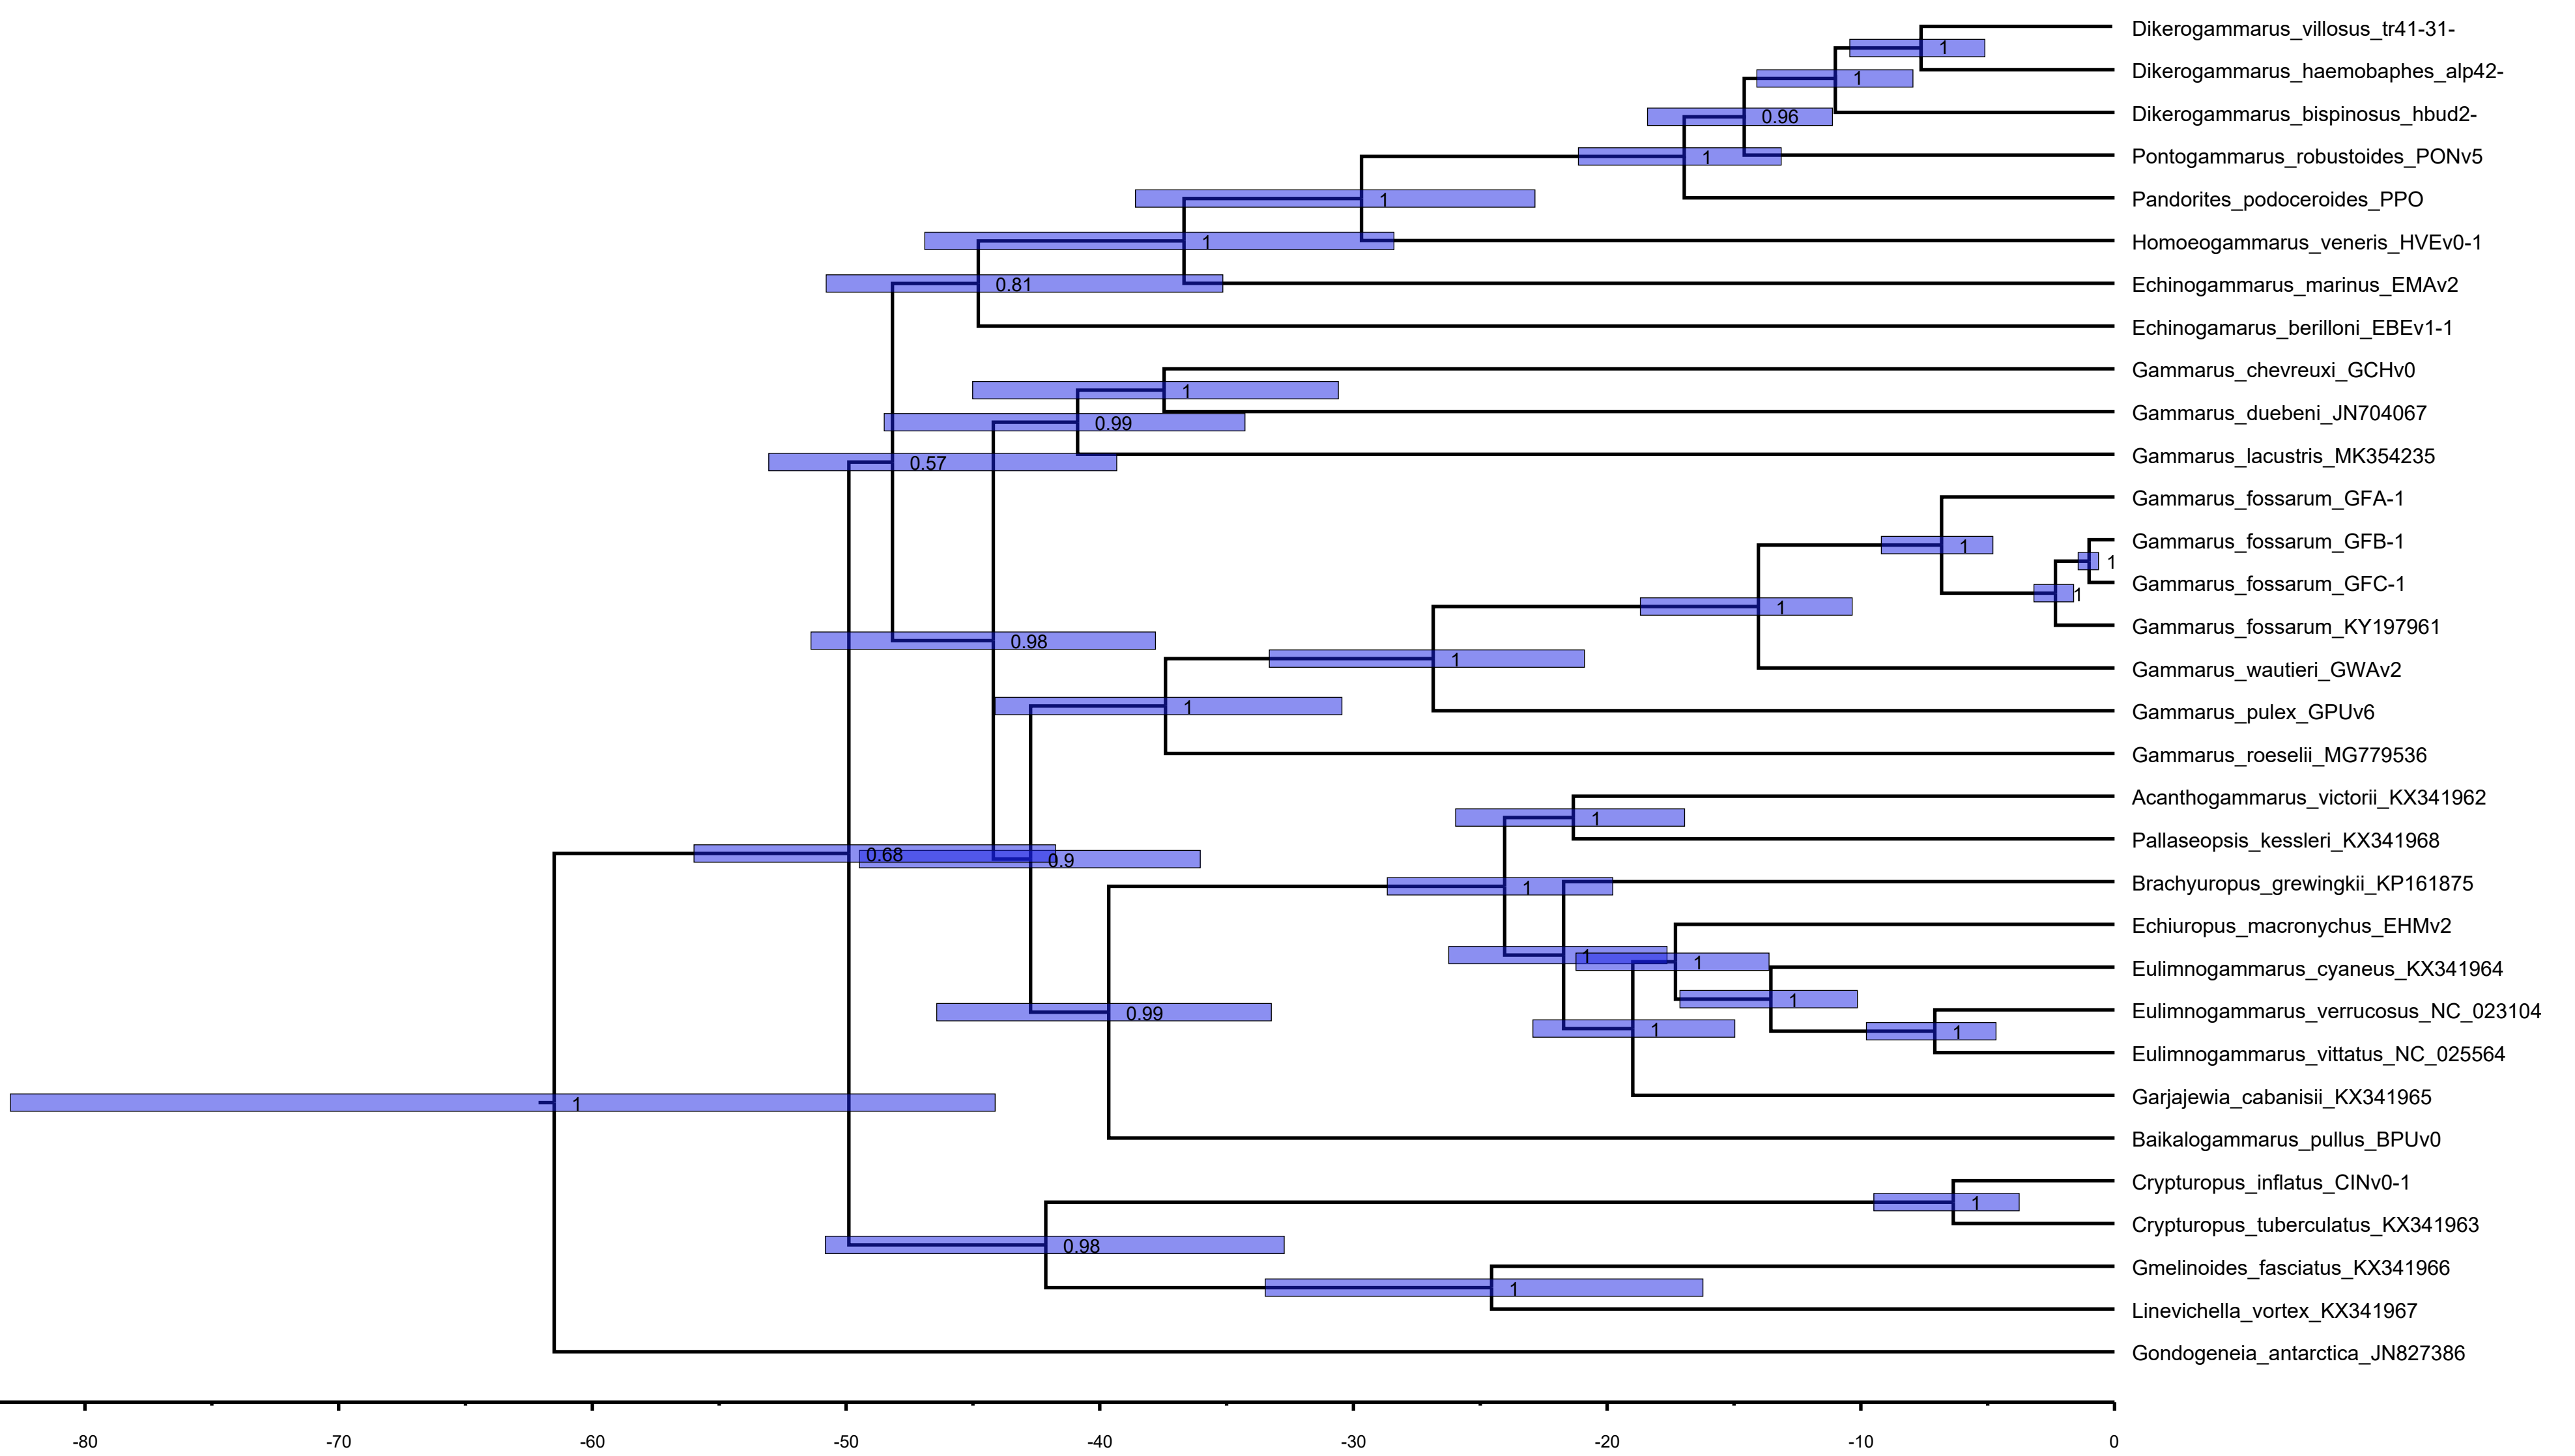

Supplement: Supplementary file 2 [file supplementary]

A

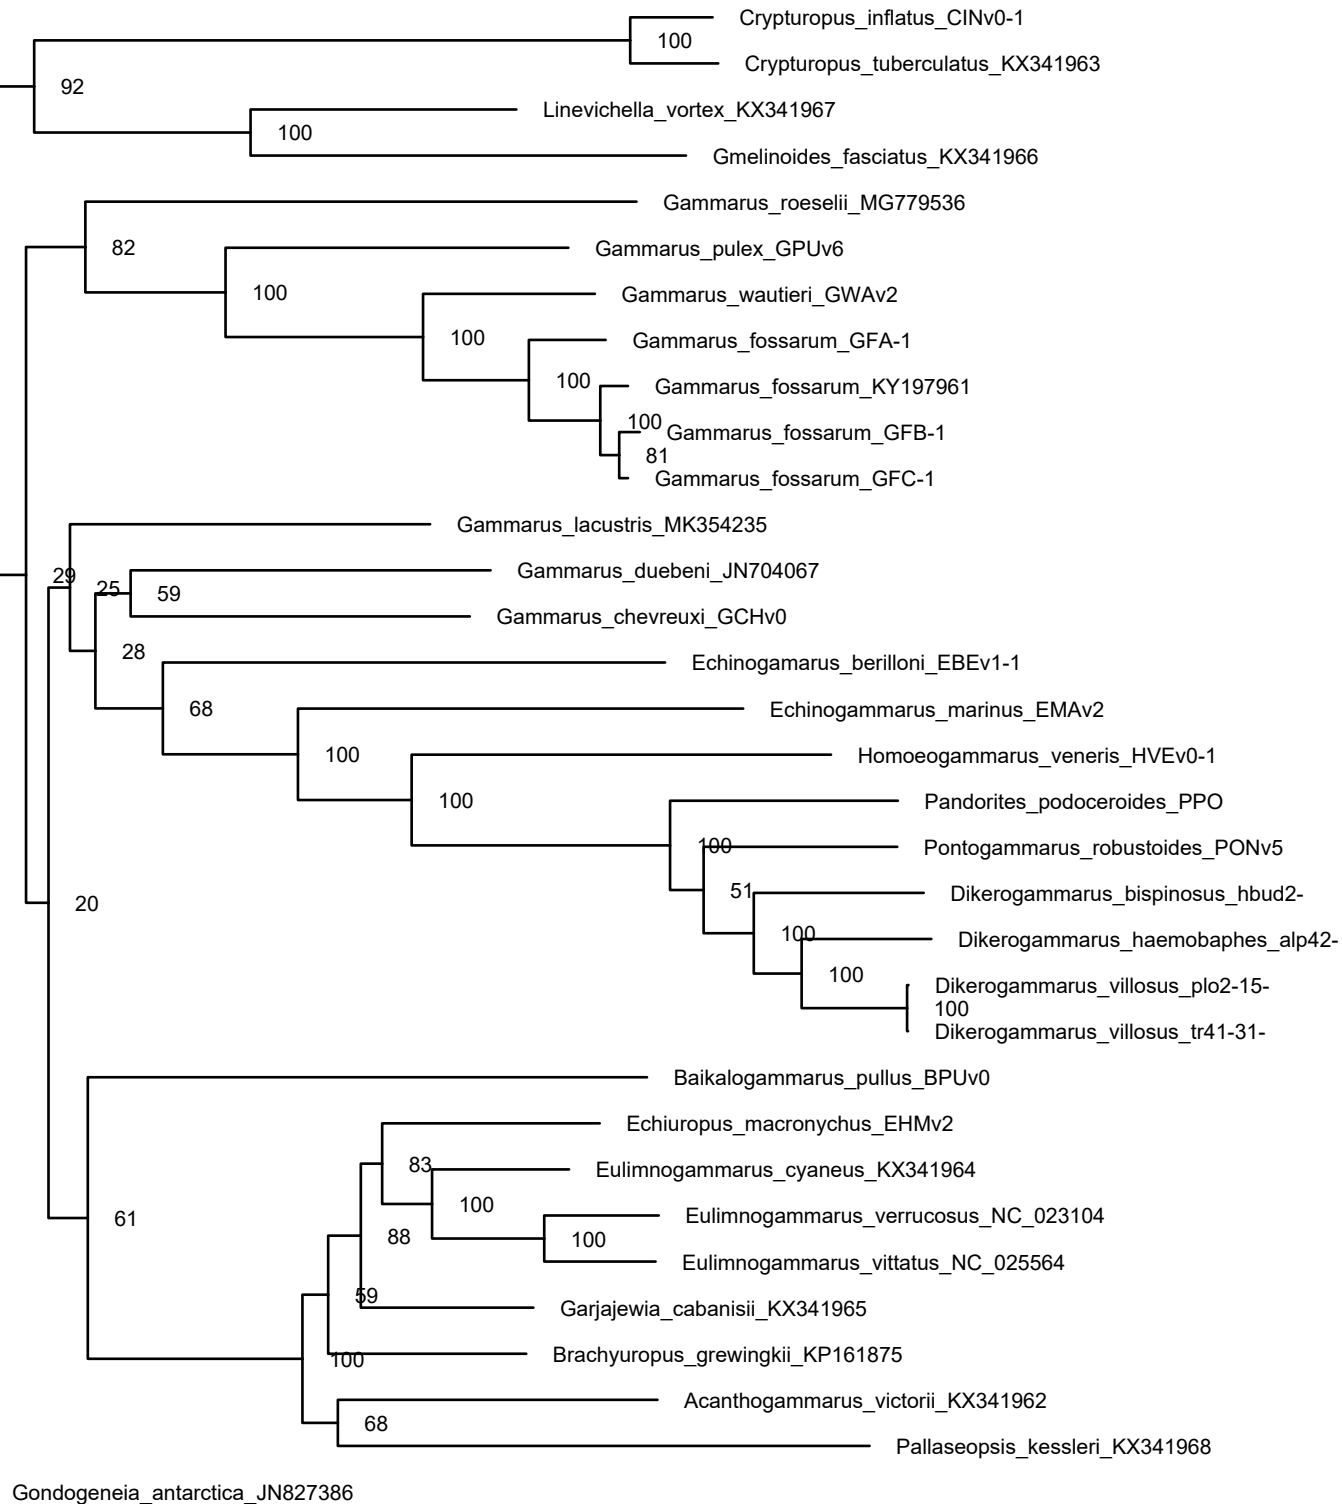

B

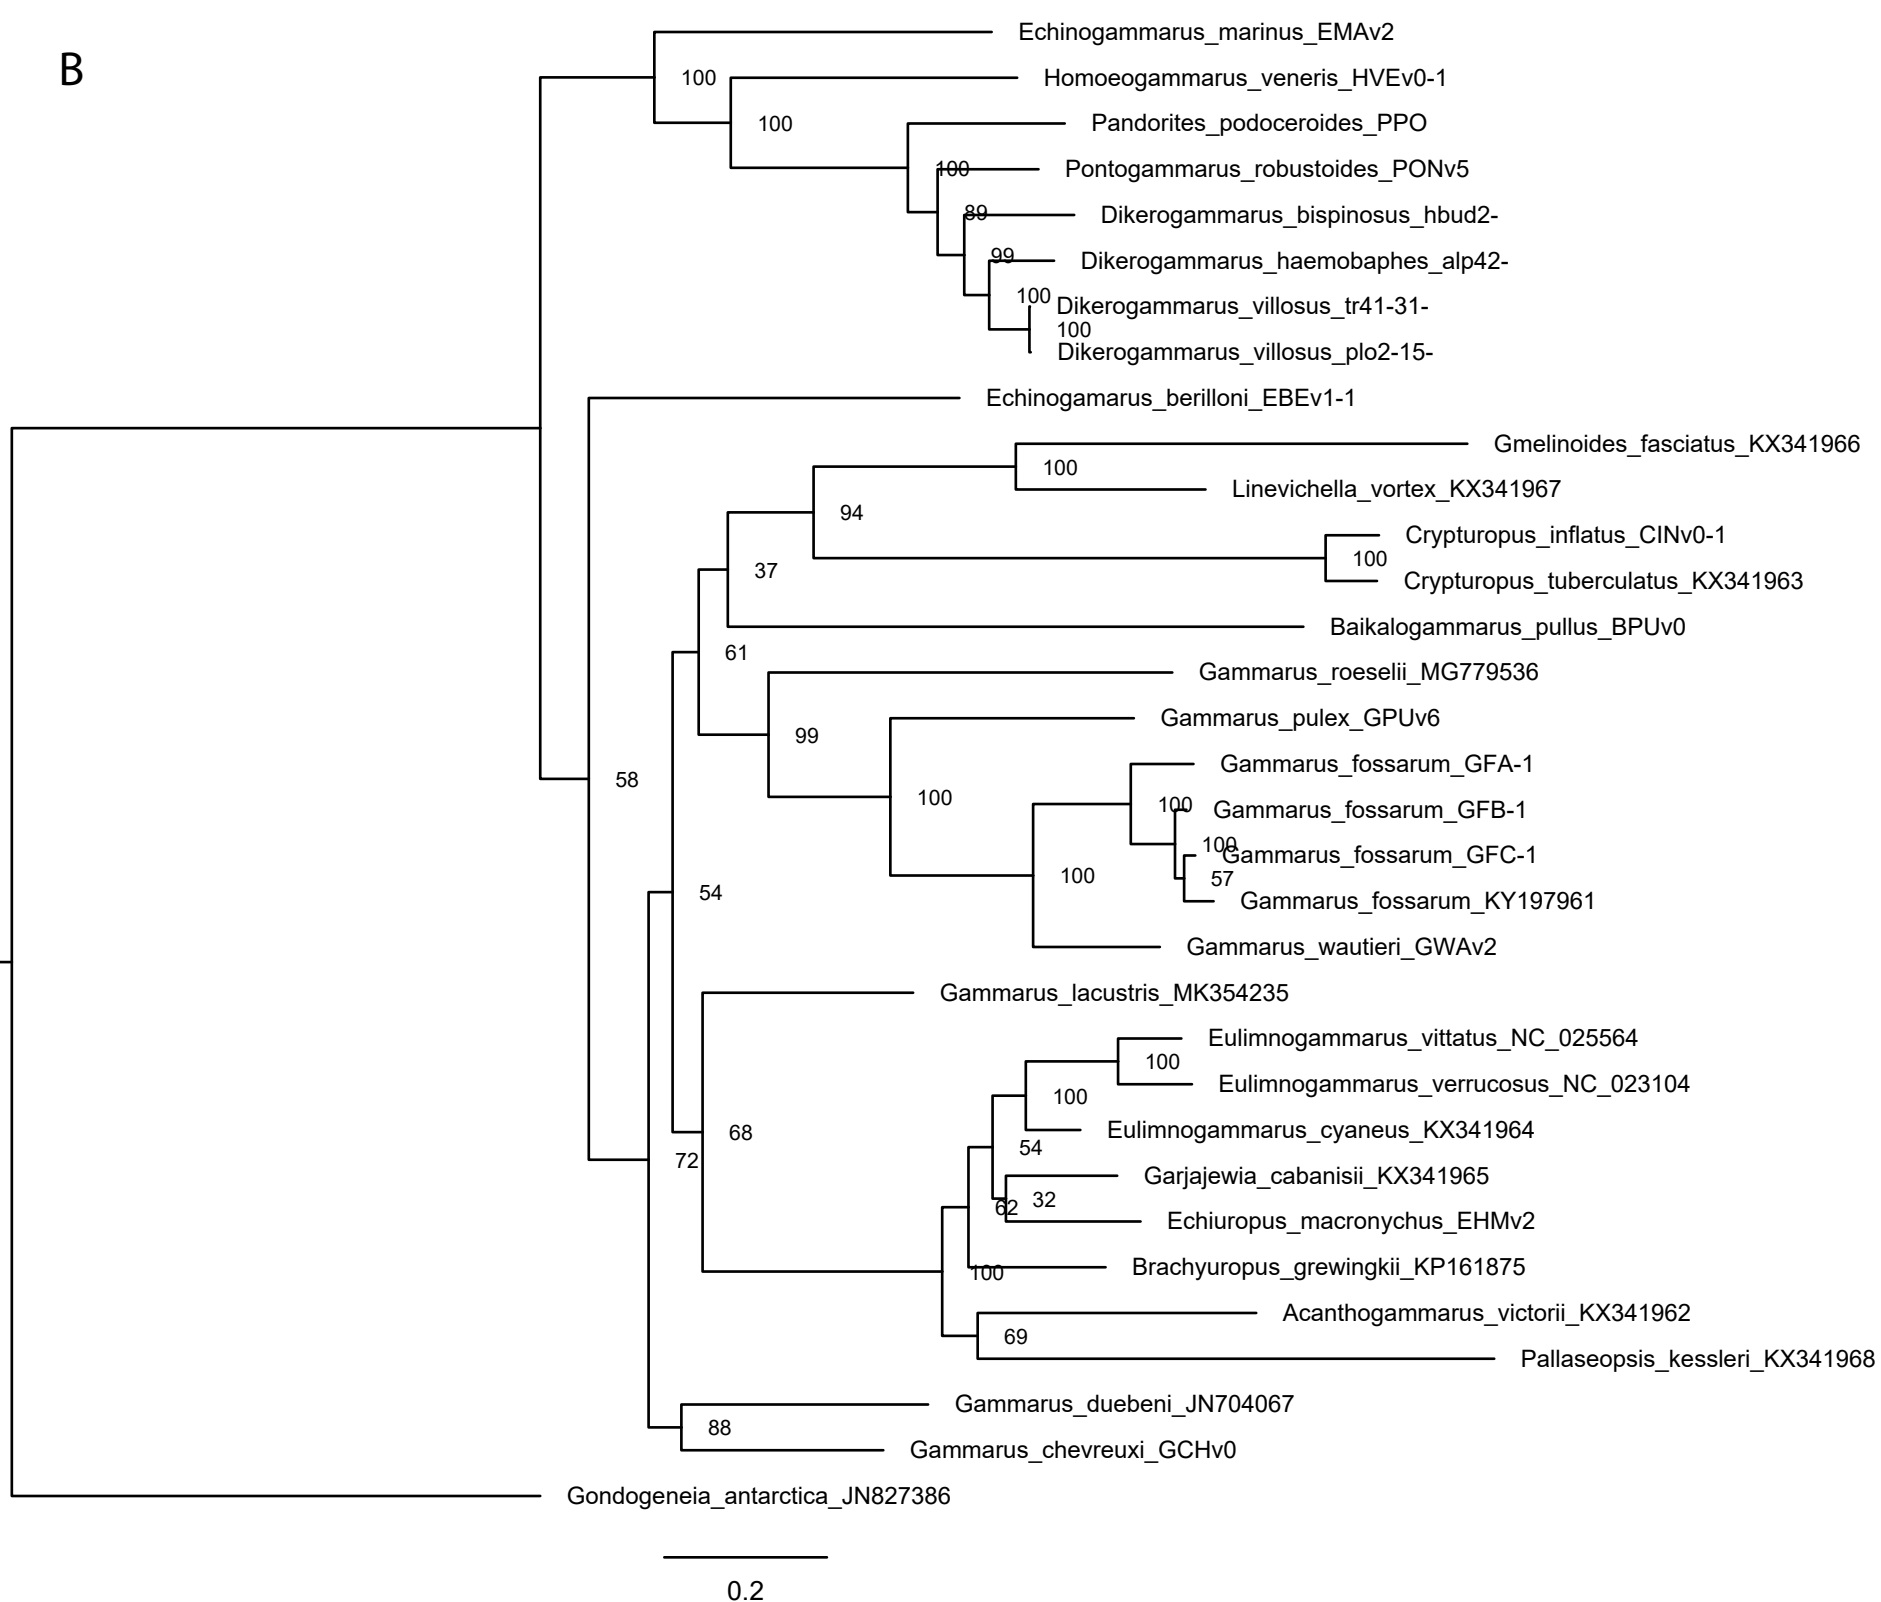

Supplement: Supplementary file 3 [file supplementary]
